# Supplementary material
Source: publisher figshare collection journal article supplement (https://acs.figshare.com/ndownloader/files/4943989)

## Supporting Information

### **New Fusaric Acid Derivatives from the Endophytic Fungus *Fusarium oxysporum* and Their Phytotoxicity to Barley Leaves**

**Shuai Liu,<sup>†</sup> Haofu Dai,<sup>‡</sup> Raha S. Orfali,<sup>§</sup> Wenhan Lin,<sup>⊥</sup> Zhen Liu,<sup>\*,†</sup> Peter Proksch<sup>\*,†</sup>**

<sup>†</sup>Institute of Pharmaceutical Biology and Biotechnology, Heinrich-Heine-Universität Düsseldorf, Universitätsstrasse 1, 40225 Düsseldorf, Germany

<sup>‡</sup>Key Laboratory of Biology and Genetic Resources of Tropical Crops, Ministry of Agriculture, Institute of Tropical Bioscience and Biotechnology, Chinese Academy of Tropical Agricultural Sciences, Haikou 571101, China

<sup>§</sup>Department of Pharmacognosy, Faculty of Pharmacy, King Saud University, Riyadh, Saudi Arabia

<sup>⊥</sup>State Key Laboratory of Natural and Biomimetic Drugs, Peking University, Beijing 100191, China

| Figures                                                                                                                                                              | Page |
|----------------------------------------------------------------------------------------------------------------------------------------------------------------------|------|
| <b>S1-A.</b> Analysis of trifluoroacetyl sample 1 (degraded from compound <b>3</b> ) and trifluoroacetyl tetritol standards by gas chromatography.                   | 4    |
| <b>S1-B.</b> Analysis of trifluoroacetyl pentitol standards by gas chromatography.                                                                                   | 5    |
| <b>S1-C.</b> Analysis of trifluoroacetyl sample 2 (degraded from mixture of compounds <b>4</b> and <b>5</b> ) by gas chromatography.                                 | 5    |
| <b>S1-D.</b> Analysis of trifluoroacetyl sample 2 (degraded from mixture of compounds <b>4</b> and <b>5</b> ) and L-arabitol in one injection by gas chromatography. | 6    |
| <b>S1-E.</b> Analysis of trifluoroacetyl sample 2 (degraded from mixture of compounds <b>4</b> and <b>5</b> ) and D-arabitol in one injection by gas chromatography. | 6    |
| <b>S2.</b> UV spectrum of compound <b>1</b> .                                                                                                                        | 7    |
| <b>S3.</b> HRESIMS spectrum of compound <b>1</b> .                                                                                                                   | 7    |
| <b>S4.</b> $^1\text{H}$ NMR (600 MHz, $\text{CD}_3\text{OD}$ ) spectrum of compound <b>1</b> .                                                                       | 8    |
| <b>S5.</b> $^{13}\text{C}$ NMR (150 MHz, $\text{CD}_3\text{OD}$ ) spectrum of compound <b>1</b> .                                                                    | 8    |
| <b>S6.</b> $^1\text{H}$ - $^1\text{H}$ COSY (600 MHz, $\text{CD}_3\text{OD}$ ) spectrum of compound <b>1</b> .                                                       | 9    |
| <b>S7.</b> HSQC (600 and 150 MHz, $\text{CD}_3\text{OD}$ ) spectrum of compound <b>1</b> .                                                                           | 9    |
| <b>S8.</b> HMBC (600 and 150 MHz, $\text{CD}_3\text{OD}$ ) spectrum of compound <b>1</b> .                                                                           | 10   |
| <b>S9.</b> UV spectrum of compound <b>2</b> .                                                                                                                        | 10   |
| <b>S10.</b> HRESIMS spectrum of compound <b>2</b> .                                                                                                                  | 11   |
| <b>S11.</b> $^1\text{H}$ NMR (600 MHz, $\text{CD}_3\text{OD}$ ) spectrum of compound <b>2</b> .                                                                      | 11   |
| <b>S12.</b> $^{13}\text{C}$ NMR (150 MHz, $\text{CD}_3\text{OD}$ ) spectrum of compound <b>2</b> .                                                                   | 12   |
| <b>S13.</b> $^1\text{H}$ - $^1\text{H}$ COSY (600 MHz, $\text{CD}_3\text{OD}$ ) spectrum of compound <b>2</b> .                                                      | 12   |
| <b>S14.</b> HMBC (600 and 150 MHz, $\text{CD}_3\text{OD}$ ) spectrum of compound <b>2</b> .                                                                          | 13   |
| <b>S15.</b> UV spectrum of compound <b>3</b> .                                                                                                                       | 13   |
| <b>S16.</b> HRESIMS spectrum of compound <b>3</b> .                                                                                                                  | 14   |
| <b>S17.</b> $^1\text{H}$ NMR (600 MHz, $\text{CD}_3\text{OD}$ ) spectrum of compound <b>3</b> .                                                                      | 14   |

|                                                                                                                                |    |
|--------------------------------------------------------------------------------------------------------------------------------|----|
| <b>S18.</b> $^1\text{H}$ - $^1\text{H}$ COSY (600 MHz, $\text{CD}_3\text{OD}$ ) spectrum of compound <b>3</b> .                | 15 |
| <b>S19.</b> HSQC (600 and 150 MHz, $\text{CD}_3\text{OD}$ ) spectrum of compound <b>3</b> .                                    | 15 |
| <b>S20.</b> HMBC (600 and 150 MHz, $\text{CD}_3\text{OD}$ ) spectrum of compound <b>3</b> .                                    | 16 |
| <b>S21.</b> UV spectrum of mixture of <b>4</b> and <b>5</b> .                                                                  | 16 |
| <b>S22.</b> HRESIMS spectrum of mixture of <b>4</b> and <b>5</b> .                                                             | 17 |
| <b>S23.</b> $^1\text{H}$ NMR (600 MHz, $\text{CD}_3\text{OD}$ ) spectrum of mixture of <b>4</b> and <b>5</b> .                 | 17 |
| <b>S24.</b> $^{13}\text{C}$ NMR (150 MHz, $\text{CD}_3\text{OD}$ ) spectrum of mixture of <b>4</b> and <b>5</b> .              | 18 |
| <b>S25.</b> $^1\text{H}$ - $^1\text{H}$ COSY (600 MHz, $\text{CD}_3\text{OD}$ ) spectrum of mixture of <b>4</b> and <b>5</b> . | 18 |
| <b>S26.</b> HSQC (600 and 150 MHz, $\text{CD}_3\text{OD}$ ) spectrum of mixture of <b>4</b> and <b>5</b> .                     | 19 |
| <b>S27.</b> HMBC (600 and 150 MHz, $\text{CD}_3\text{OD}$ ) spectrum of mixture of <b>4</b> and <b>5</b> .                     | 19 |
| <b>S28.</b> UV spectrum of mixture of <b>6</b> and <b>7</b> .                                                                  | 20 |
| <b>S29.</b> HRESIMS spectrum of mixture of <b>6</b> and <b>7</b> .                                                             | 20 |
| <b>S30.</b> $^1\text{H}$ NMR (600 MHz, $\text{CD}_3\text{OD}$ ) spectrum of mixture of <b>6</b> and <b>7</b> .                 | 21 |
| <b>S31.</b> $^{13}\text{C}$ NMR (150 MHz, $\text{CD}_3\text{OD}$ ) spectrum of mixture of <b>6</b> and <b>7</b> .              | 21 |
| <b>S32.</b> $^1\text{H}$ - $^1\text{H}$ COSY (600 MHz, $\text{CD}_3\text{OD}$ ) spectrum of mixture of <b>6</b> and <b>7</b> . | 22 |
| <b>S33.</b> HSQC (600 and 150 MHz, $\text{CD}_3\text{OD}$ ) spectrum of mixture of <b>6</b> and <b>7</b> .                     | 22 |
| <b>S34.</b> HMBC (600 and 150 MHz, $\text{CD}_3\text{OD}$ ) spectrum of mixture of <b>6</b> and <b>7</b> .                     | 23 |
| <b>S35.</b> UV spectrum of compound <b>8</b> .                                                                                 | 23 |
| <b>S36.</b> HRESIMS spectrum of compound <b>8</b> .                                                                            | 24 |
| <b>S37.</b> $^1\text{H}$ NMR (600 MHz, $\text{CD}_3\text{OD}$ ) spectrum of compound <b>8</b> .                                | 24 |
| <b>S38.</b> $^1\text{H}$ - $^1\text{H}$ COSY (600 MHz, $\text{CD}_3\text{OD}$ ) spectrum of compound <b>8</b> .                | 25 |
| <b>S39.</b> HSQC (600 and 150 MHz, $\text{CD}_3\text{OD}$ ) spectrum of compound <b>8</b> .                                    | 25 |
| <b>S40.</b> HMBC (600 and 150 MHz, $\text{CD}_3\text{OD}$ ) spectrum of compound <b>8</b> .                                    | 26 |
| <b>S41.</b> Phytotoxic bioassay for fusaric acid derivatives                                                                   | 27 |

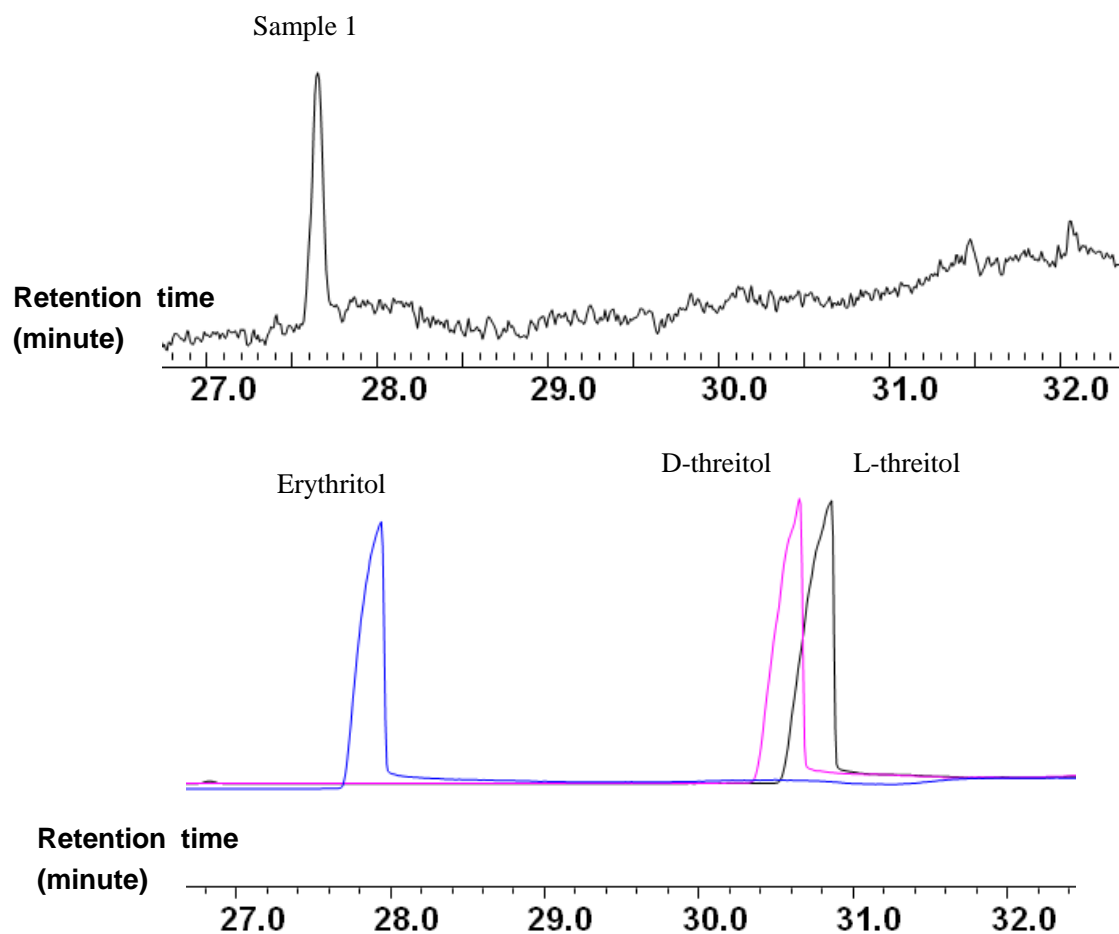

**S1-A.** Analysis of trifluoroacetyl sample 1 (degraded from compound **3**) and trifluoroacetyl tetritol standards by gas chromatography.

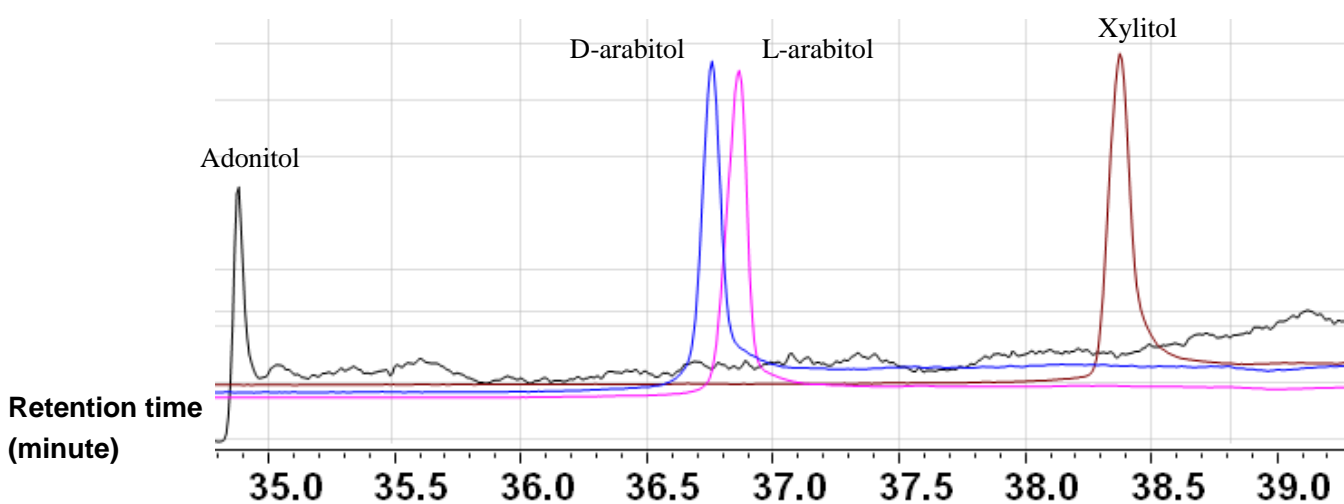

**S1-B.** Analysis of trifluoroacetyl pentitol standards by gas chromatography.

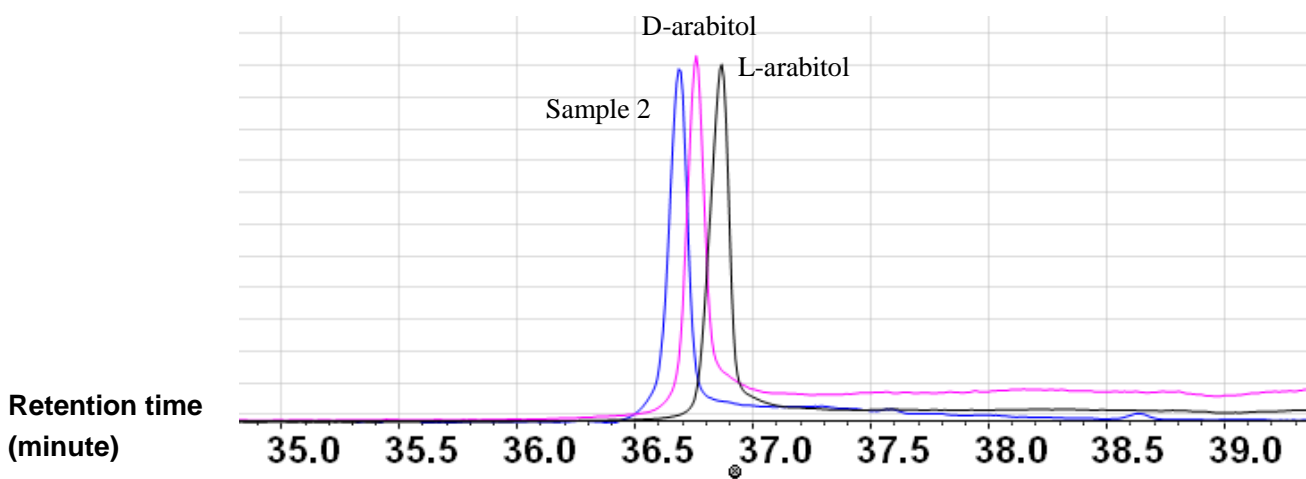

**S1-C.** Analysis of trifluoroacetyl sample 2 (degraded from mixture of compounds **4** and **5**) by gas chromatography.

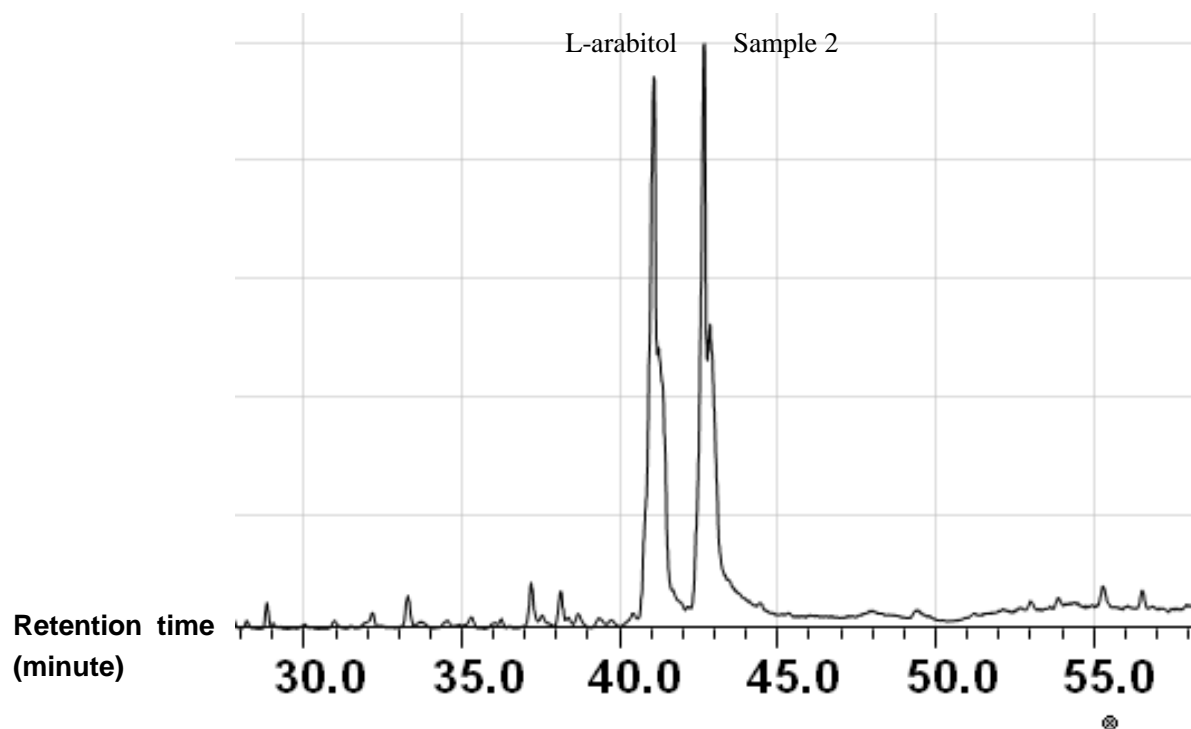

**S1-D.** Analysis of trifluoroacetyl sample 2 (degraded from mixture of compounds **4** and **5**) and L-arabitol in one injection by gas chromatography.

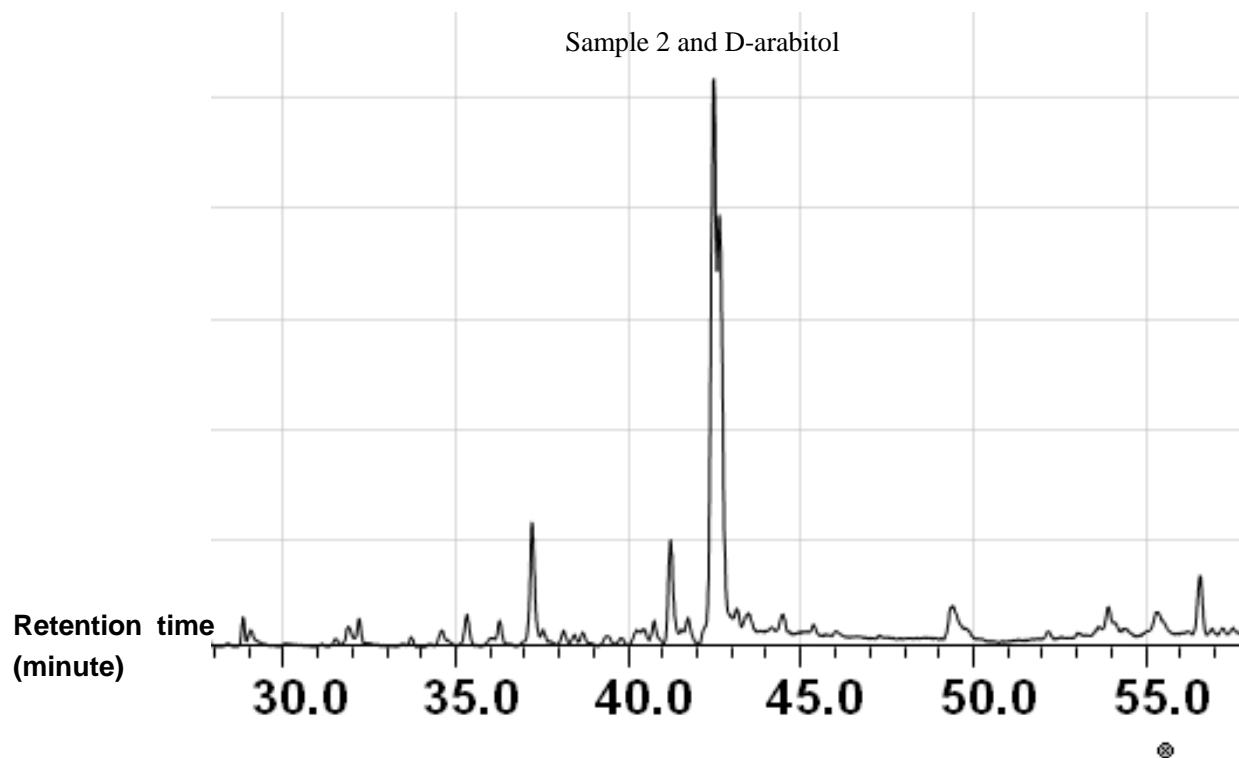

**S1-E.** Analysis of trifluoroacetyl sample 2 (degraded from mixture of compounds **4** and **5**) and D-arabitol in one injection by gas chromatography.

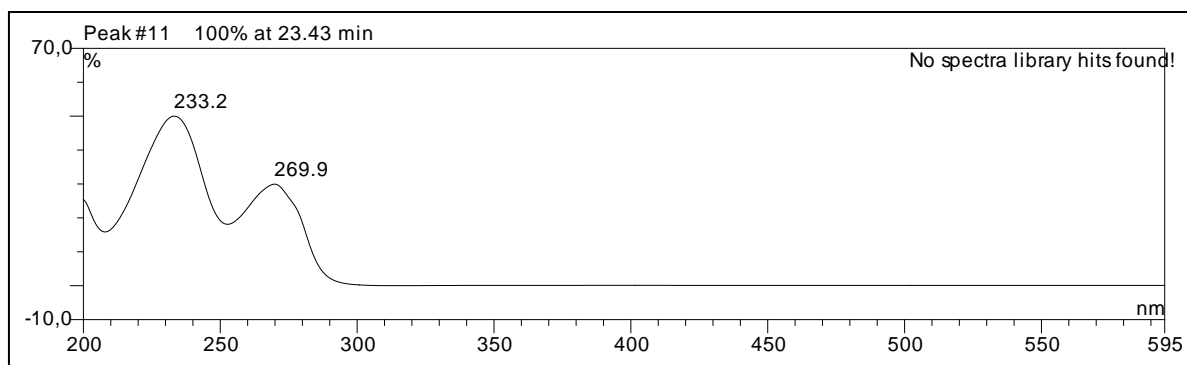

## S2. UV spectrum of compound 1.

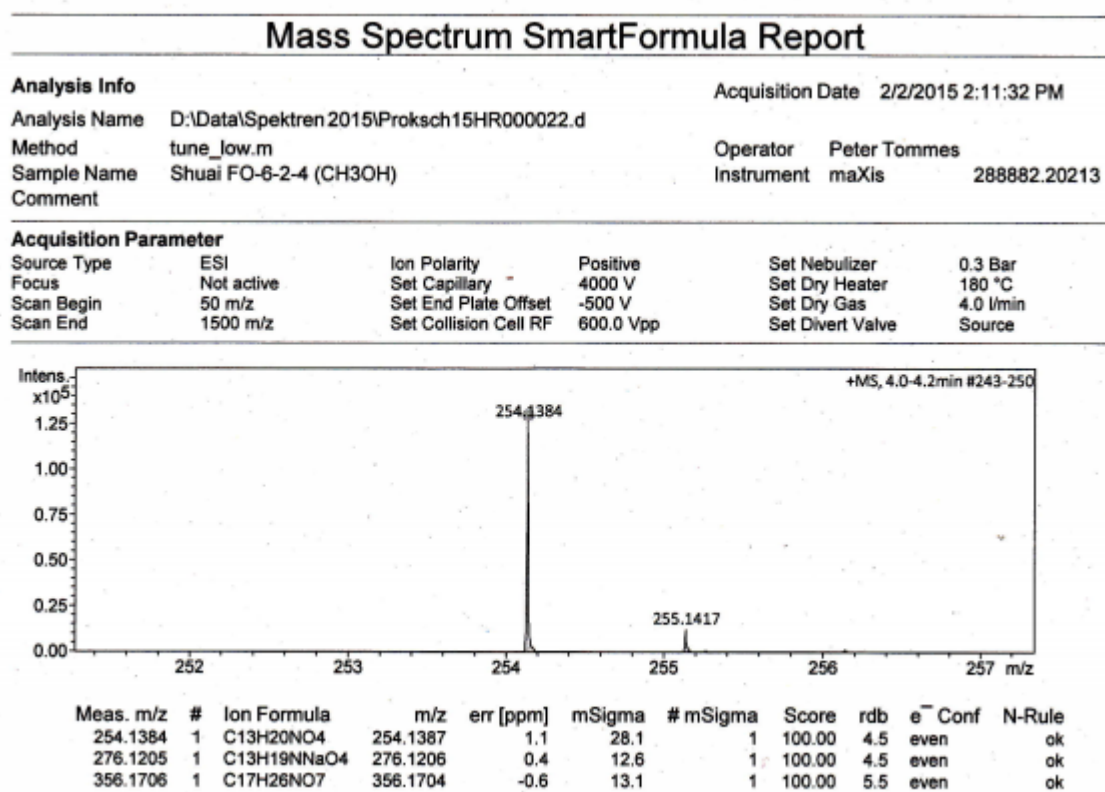

## S3. HRESIMS spectrum of compound 1.

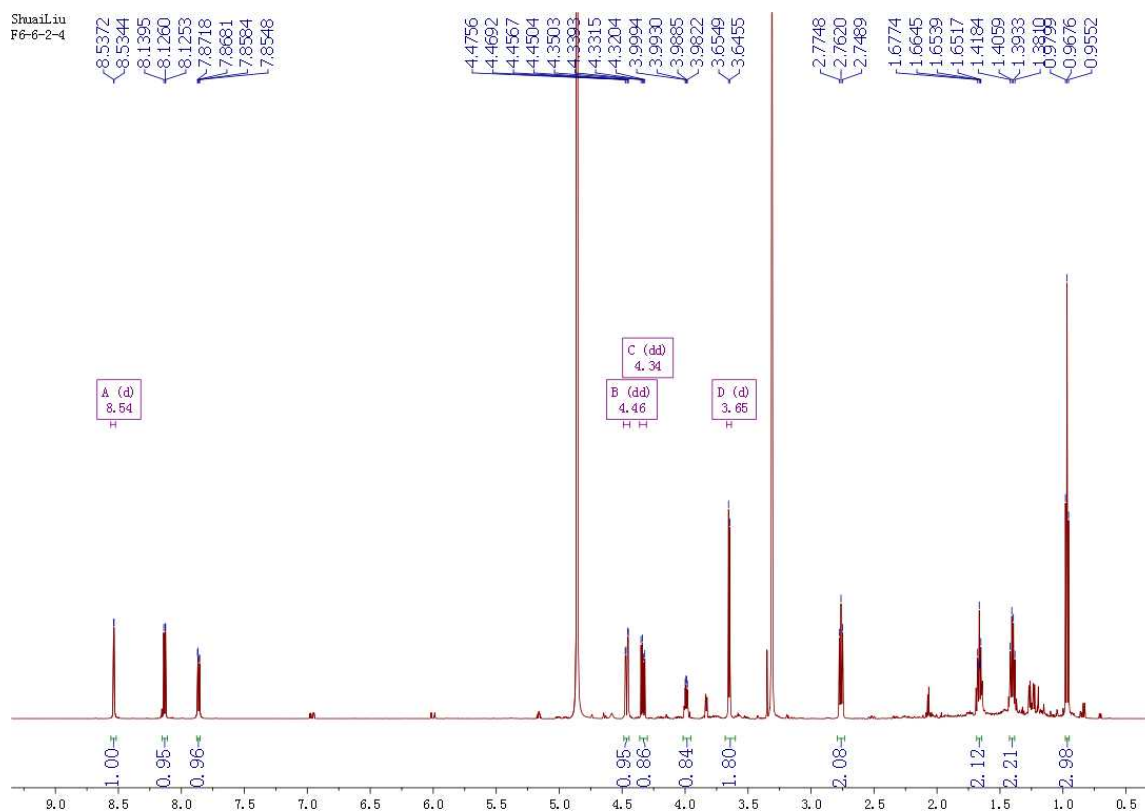

**S4.**  $^1\text{H}$  NMR (600 MHz,  $\text{CD}_3\text{OD}$ ) spectrum of compound **1**.

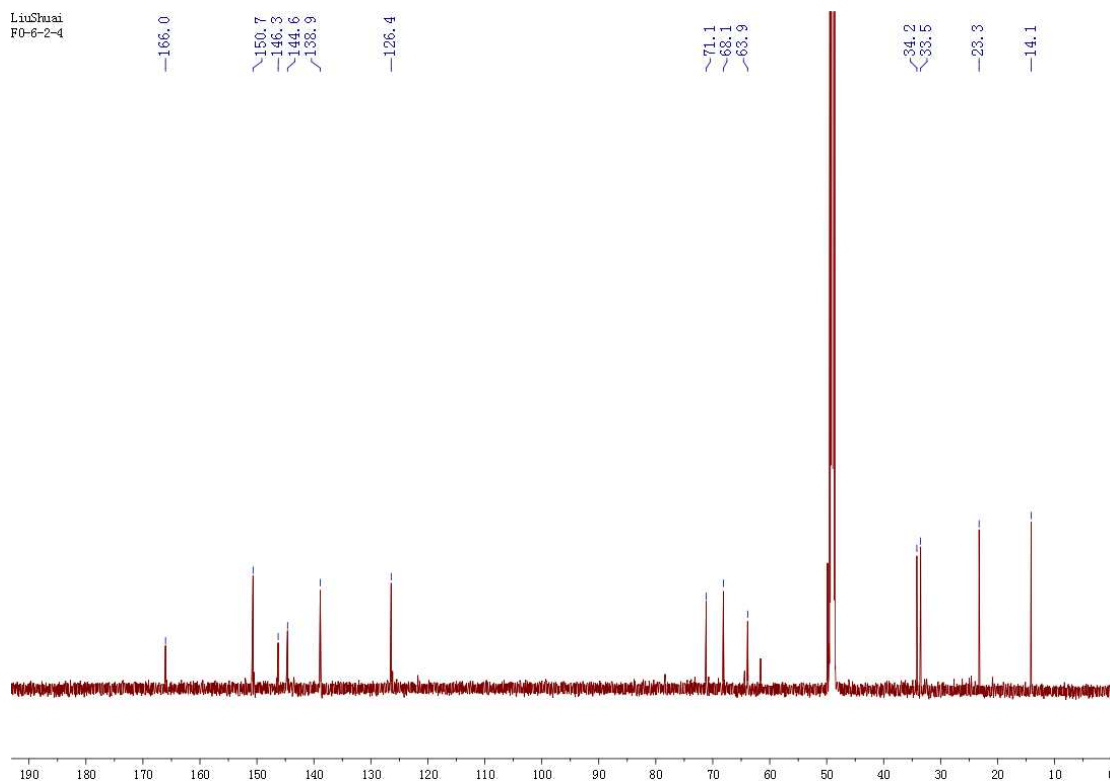

**S5.**  $^{13}\text{C}$  NMR (150 MHz,  $\text{CD}_3\text{OD}$ ) spectrum of compound **1**.



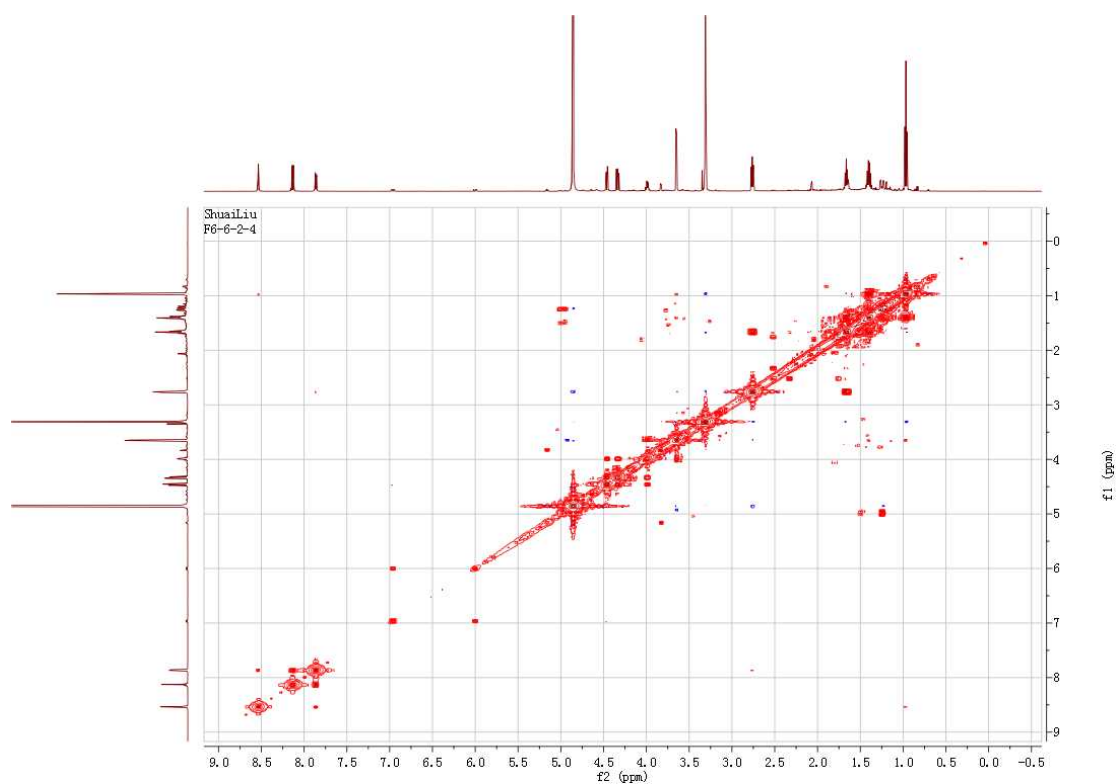

**S6.**  $^1\text{H}$ - $^1\text{H}$  COSY (600 MHz,  $\text{CD}_3\text{OD}$ ) spectrum of compound **1**.

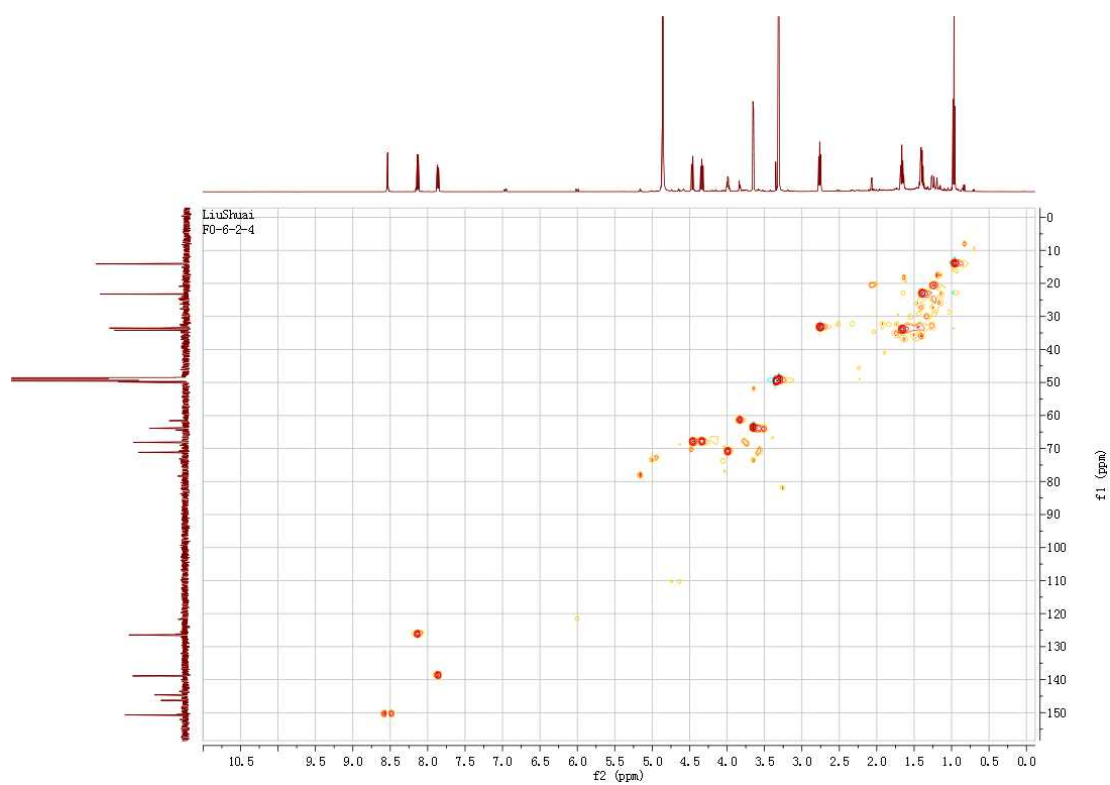

**S7.** HSQC (600 and 150 MHz,  $\text{CD}_3\text{OD}$ ) spectrum of compound **1**.

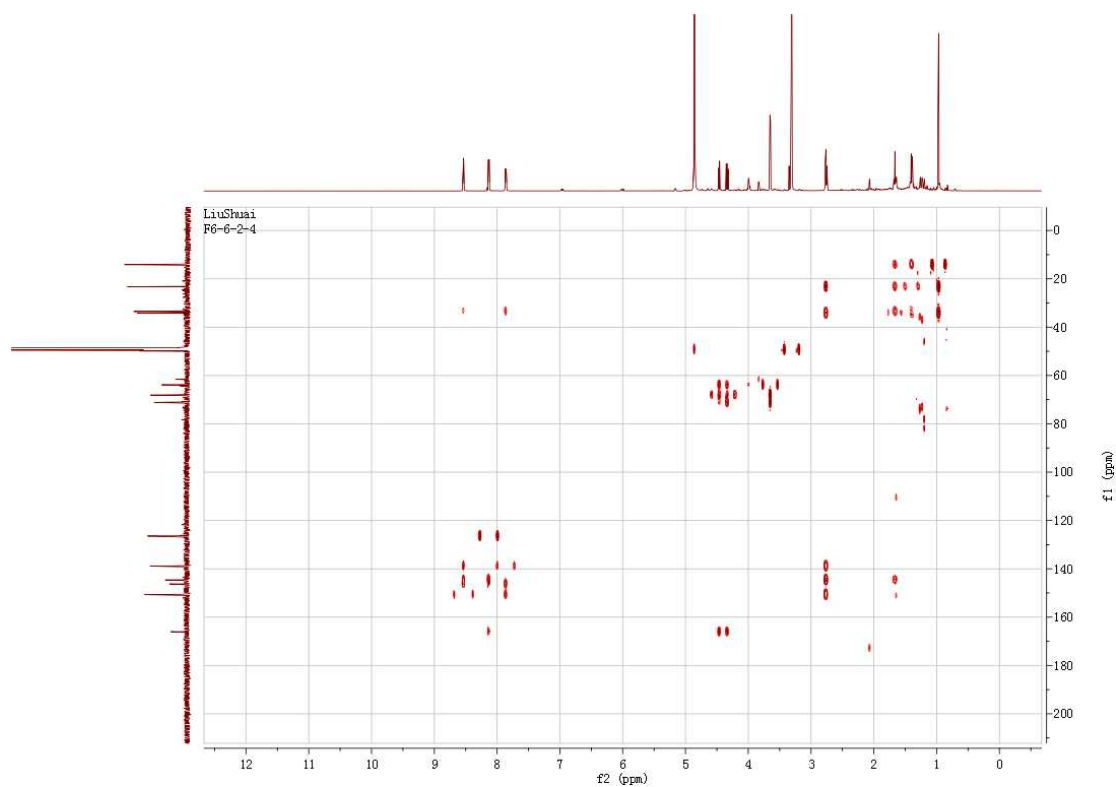

**S8.** HMBC (600 and 150 MHz, CD<sub>3</sub>OD) spectrum of compound **1**.

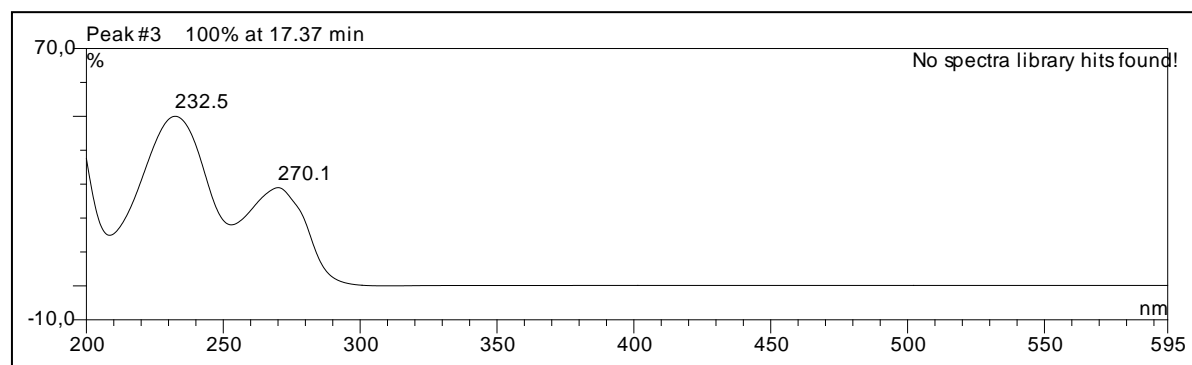

**S9.** UV spectrum of compound **2**.

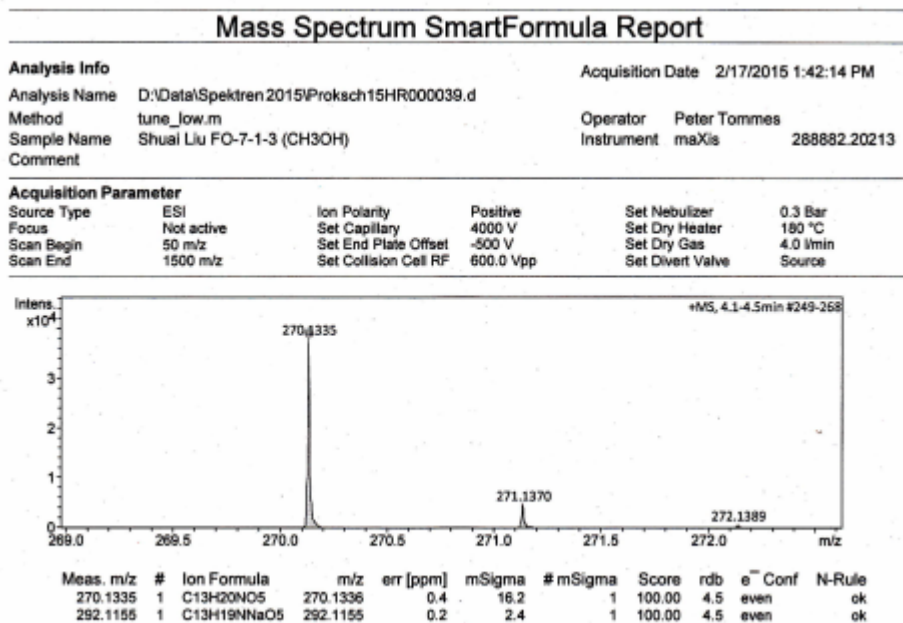

**S10.** HRESIMS spectrum of compound **2**.

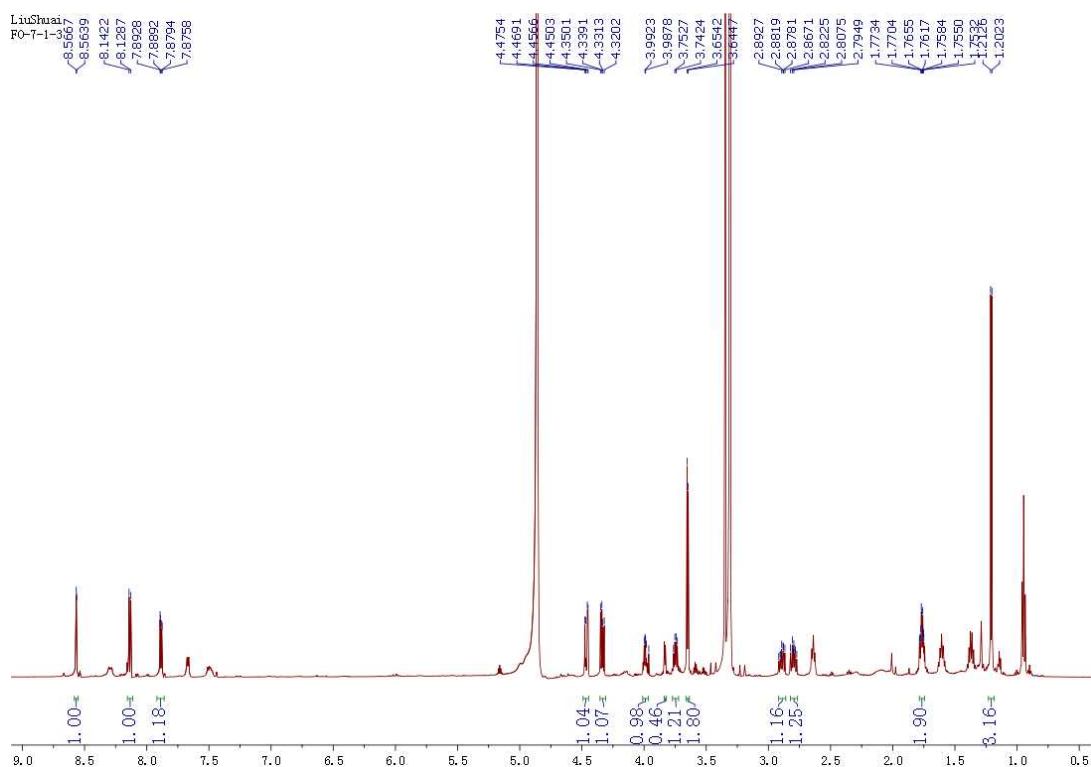

**S11.** <sup>1</sup>H NMR (600 MHz, CD<sub>3</sub>OD) spectrum of compound **2**.

LiuShuai  
FO-7-1-3

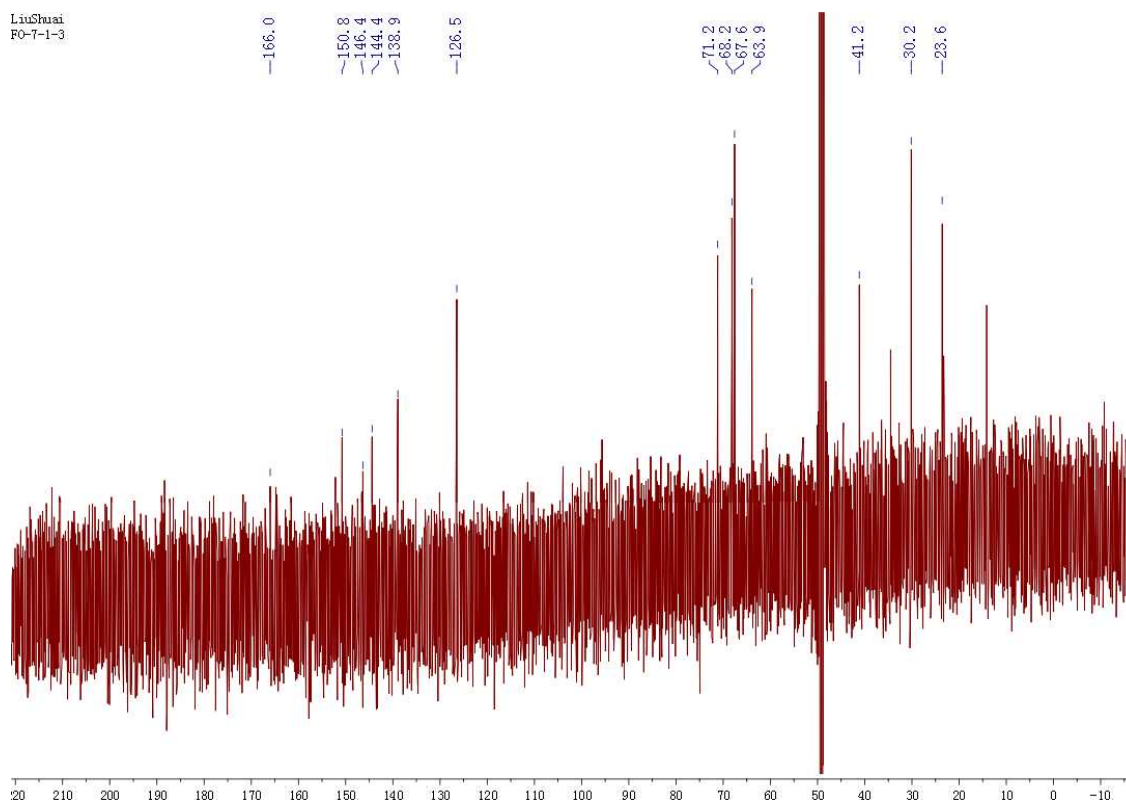

**S12.**  $^{13}\text{C}$  NMR (150 MHz,  $\text{CD}_3\text{OD}$ ) spectrum of compound **2**.

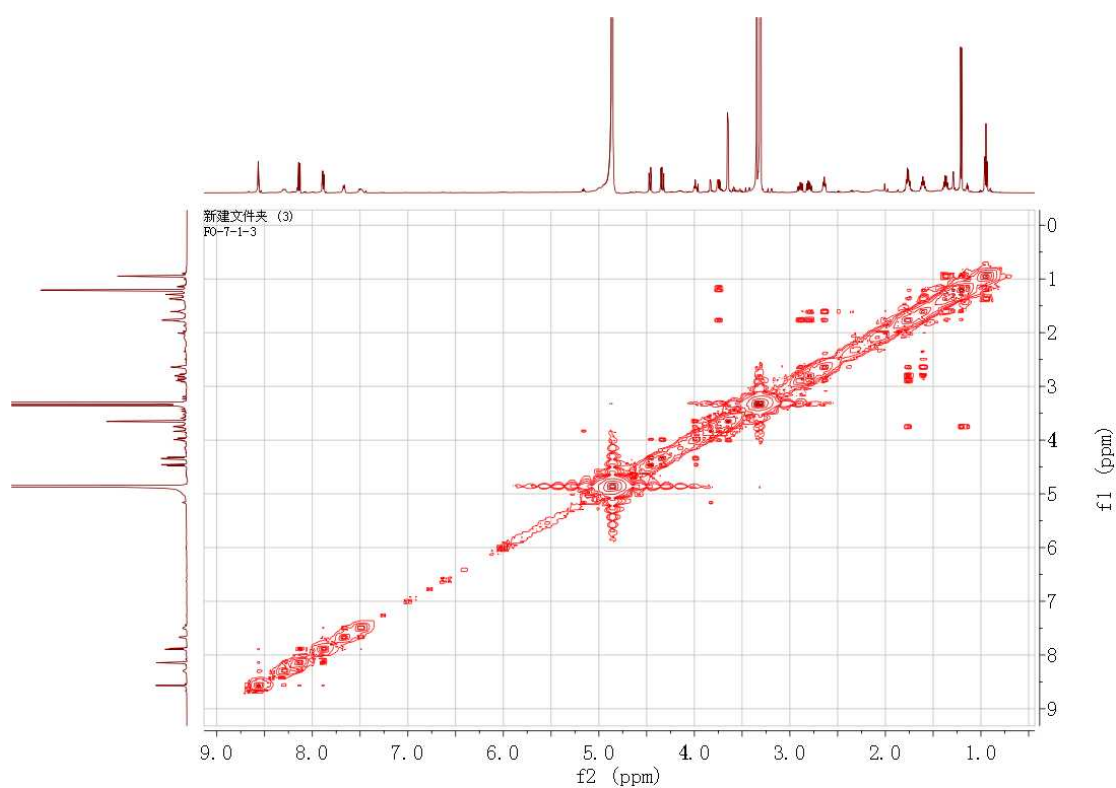

**S13.**  $^1\text{H}$ - $^1\text{H}$  COSY (600 MHz,  $\text{CD}_3\text{OD}$ ) spectrum of compound **2**.

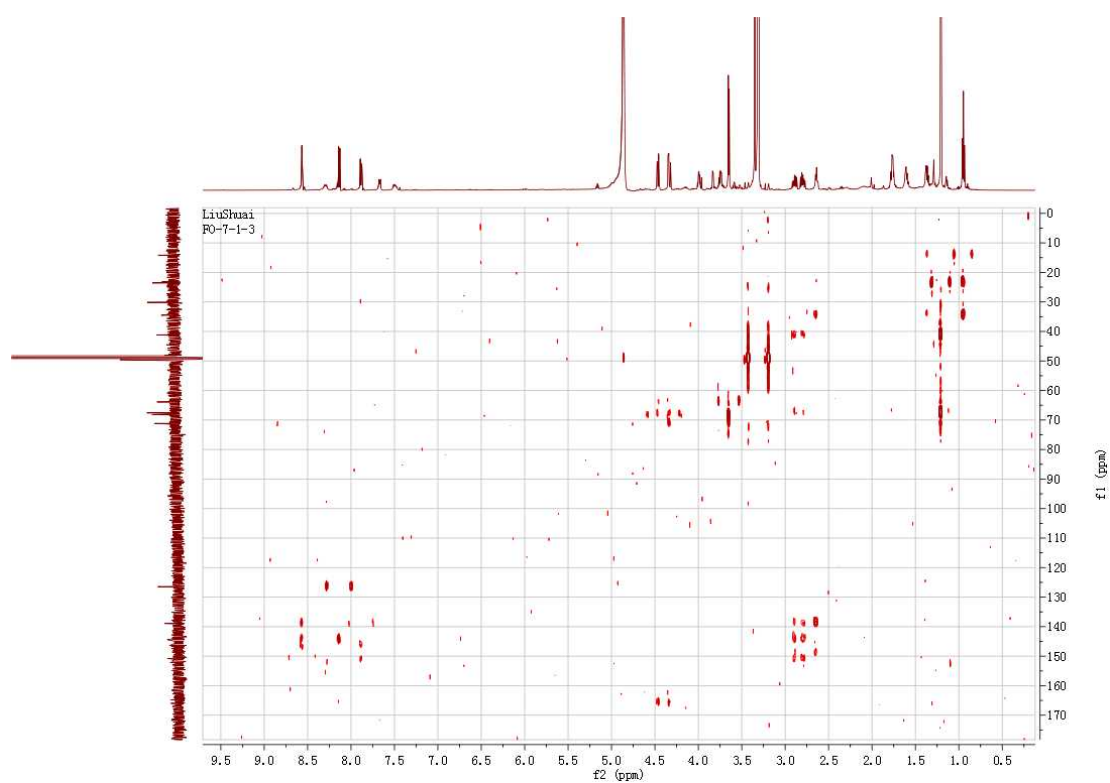

**S14.** HMBC (600 and 150 MHz, CD<sub>3</sub>OD) spectrum of compound **2**.

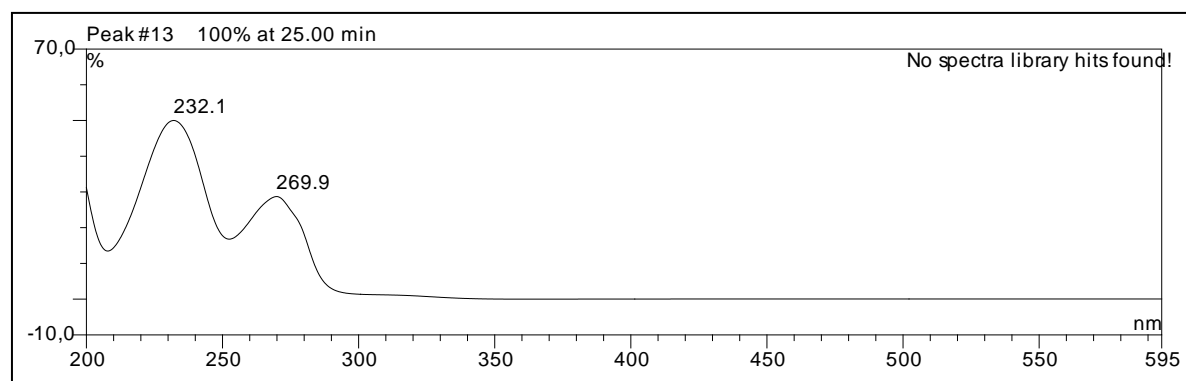

**S15.** UV spectrum of compound **3**.

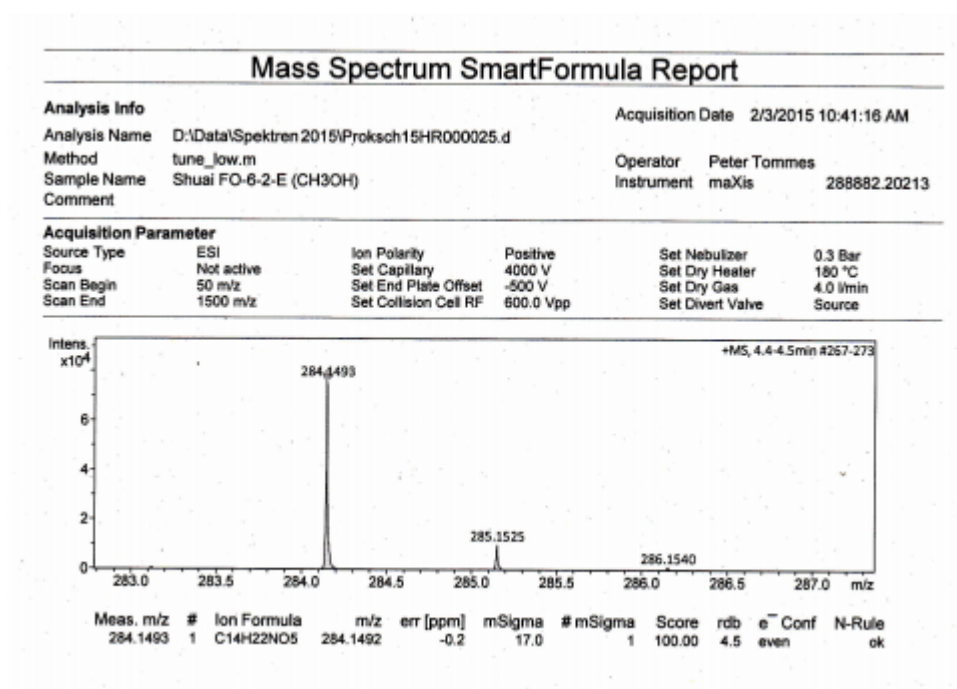

**S16.** HRESIMS spectrum of compound **3**.

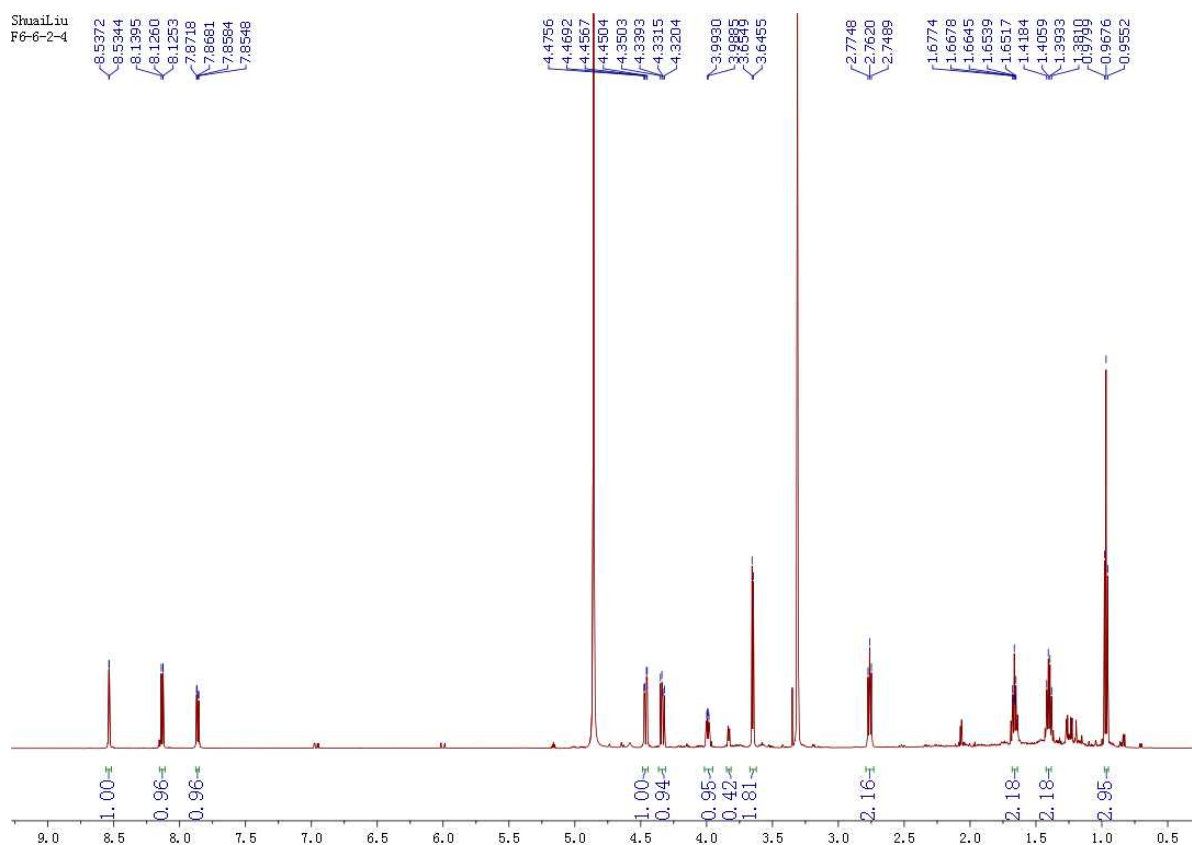

**S17.** <sup>1</sup>H NMR (600 MHz, CD<sub>3</sub>OD) spectrum of compound **3**.

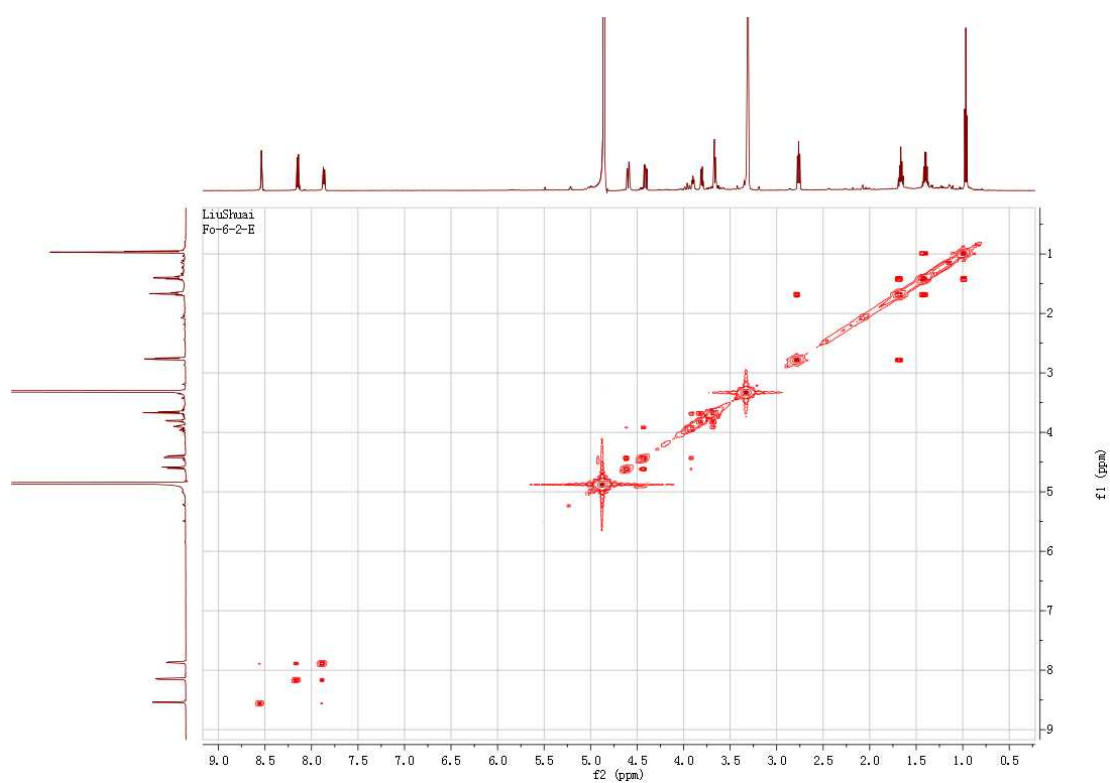

**S18.**  $^1\text{H}$ - $^1\text{H}$  COSY (600 MHz,  $\text{CD}_3\text{OD}$ ) spectrum of compound **3**.

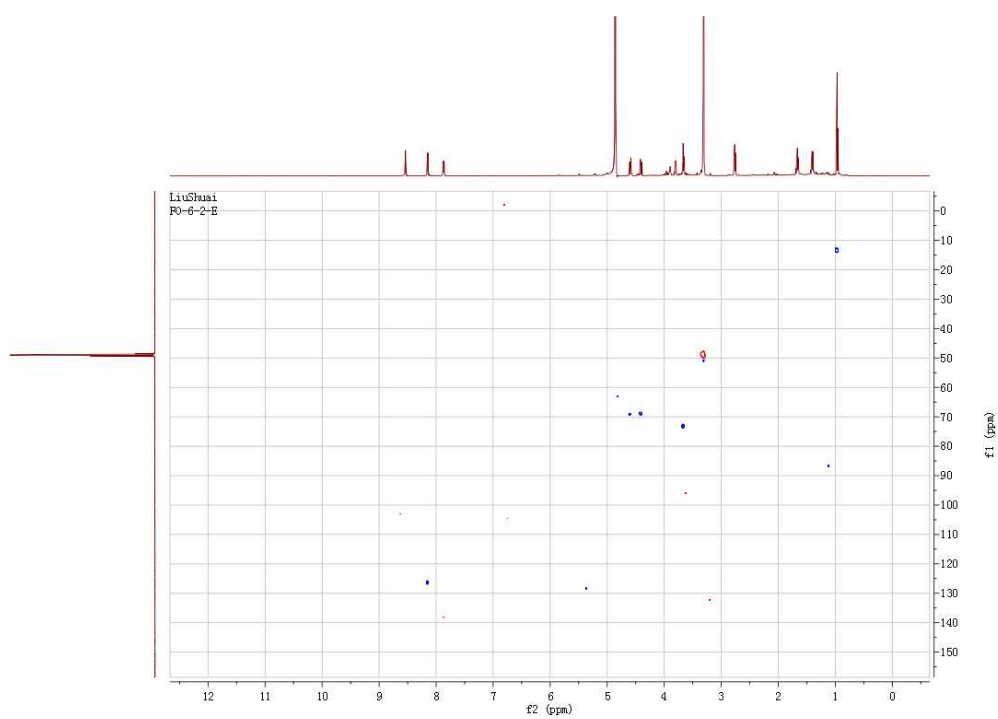

**S19.** HSQC (600 and 150 MHz,  $\text{CD}_3\text{OD}$ ) spectrum of compound **3**.

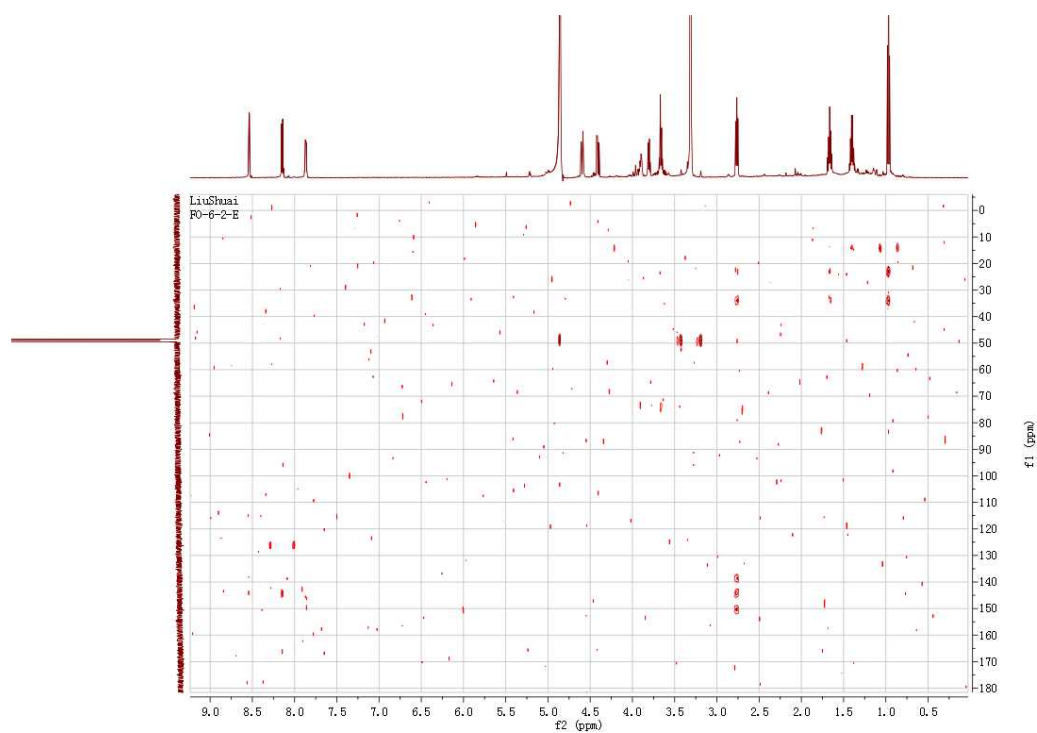

**S20.** HMBC (600 and 150 MHz, CD<sub>3</sub>OD) spectrum of compound **3**.

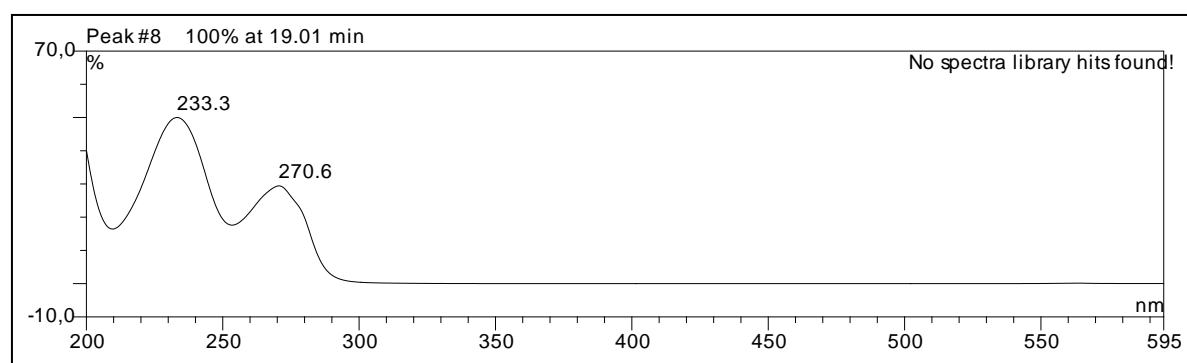

**S21.** UV spectrum of mixture of **4** and **5**.



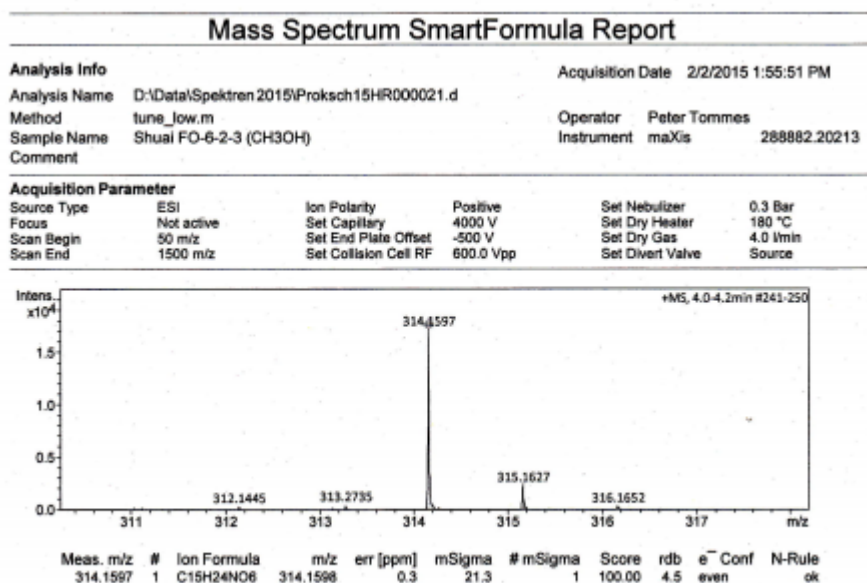

**S22. HRESIMS spectrum of mixture of 4 and 5.**

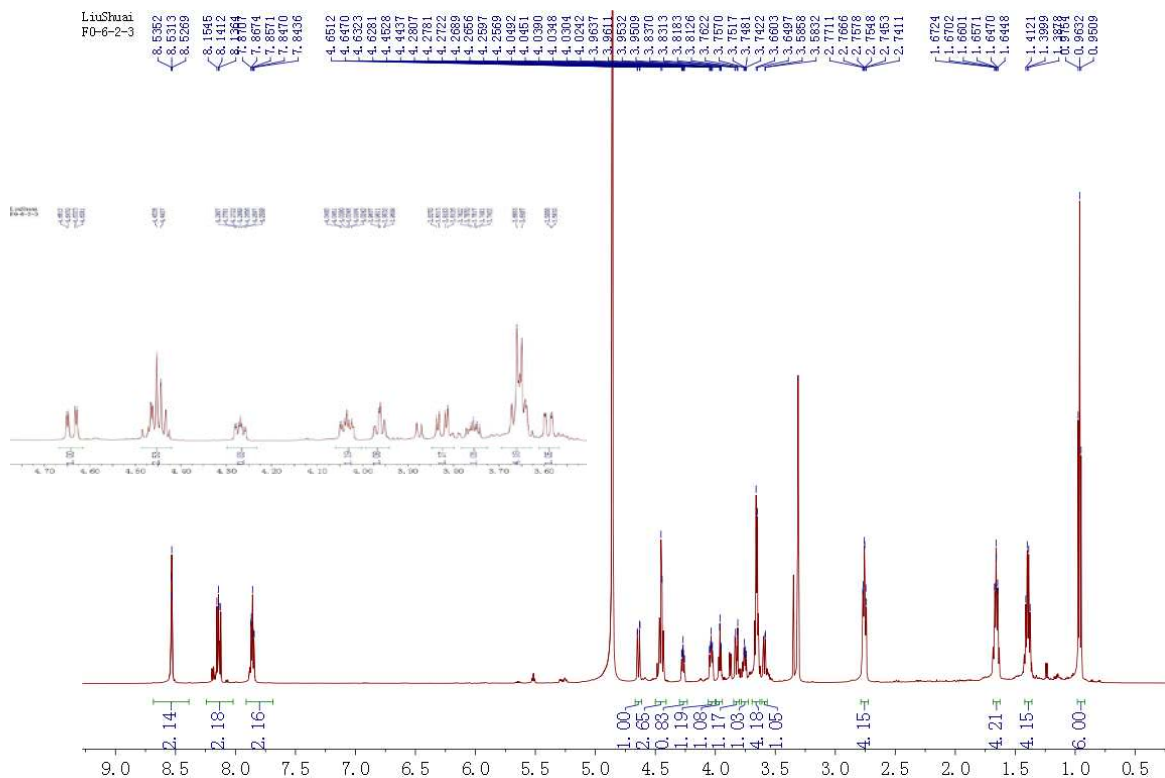

**S23. <sup>1</sup>H NMR (600 MHz, CD<sub>3</sub>OD) spectrum of mixture of 4 and 5.**

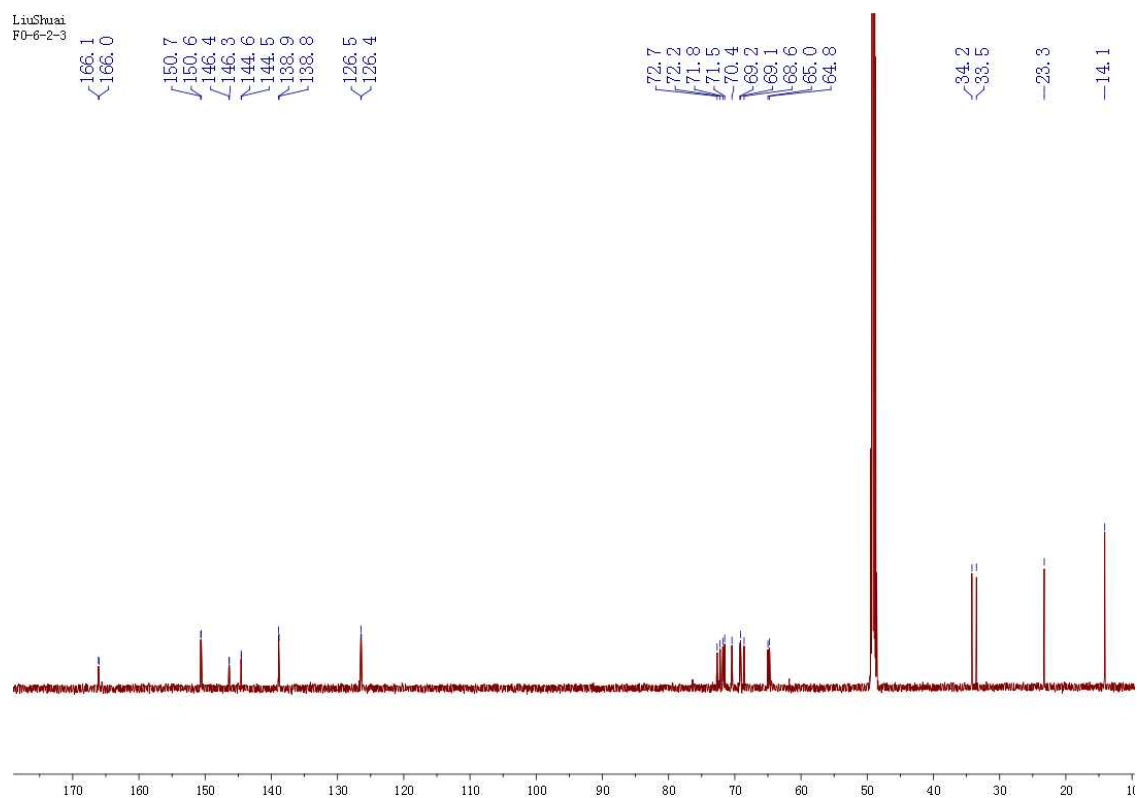

**S24.**  $^{13}\text{C}$  NMR (150 MHz,  $\text{CD}_3\text{OD}$ ) spectrum of mixture of **4** and **5**.

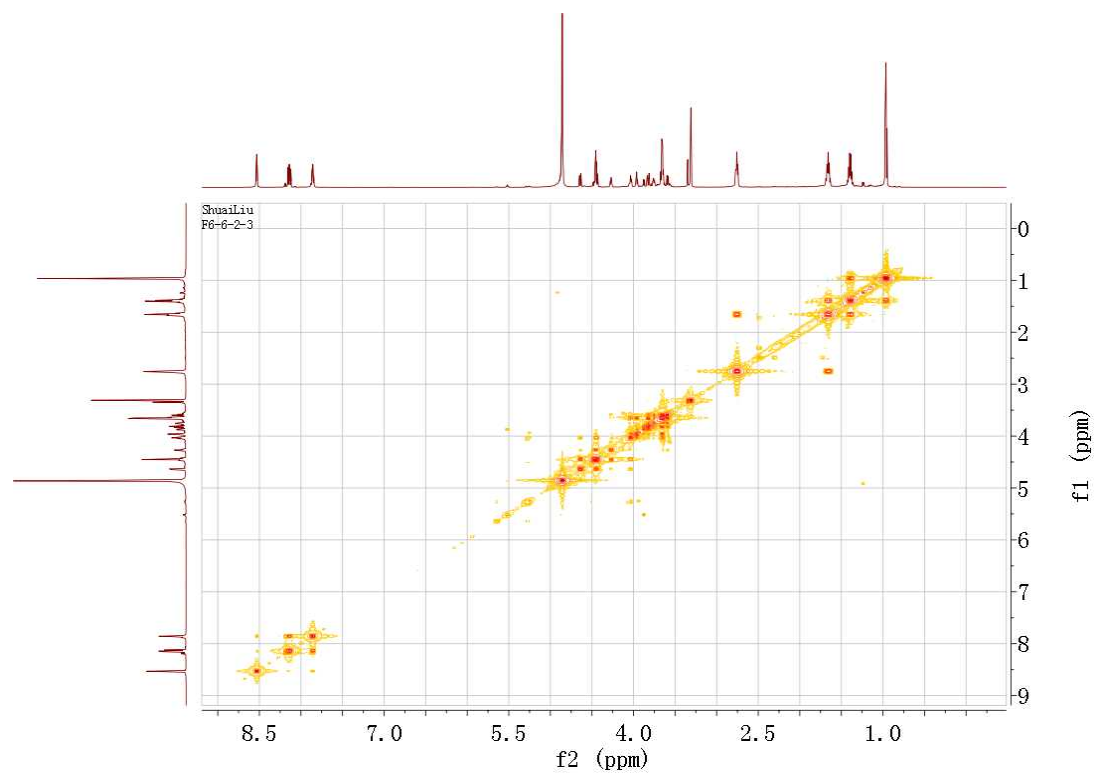

**S25.**  $^1\text{H}$ - $^1\text{H}$  COSY (600 MHz,  $\text{CD}_3\text{OD}$ ) spectrum of mixture of **4** and **5**.

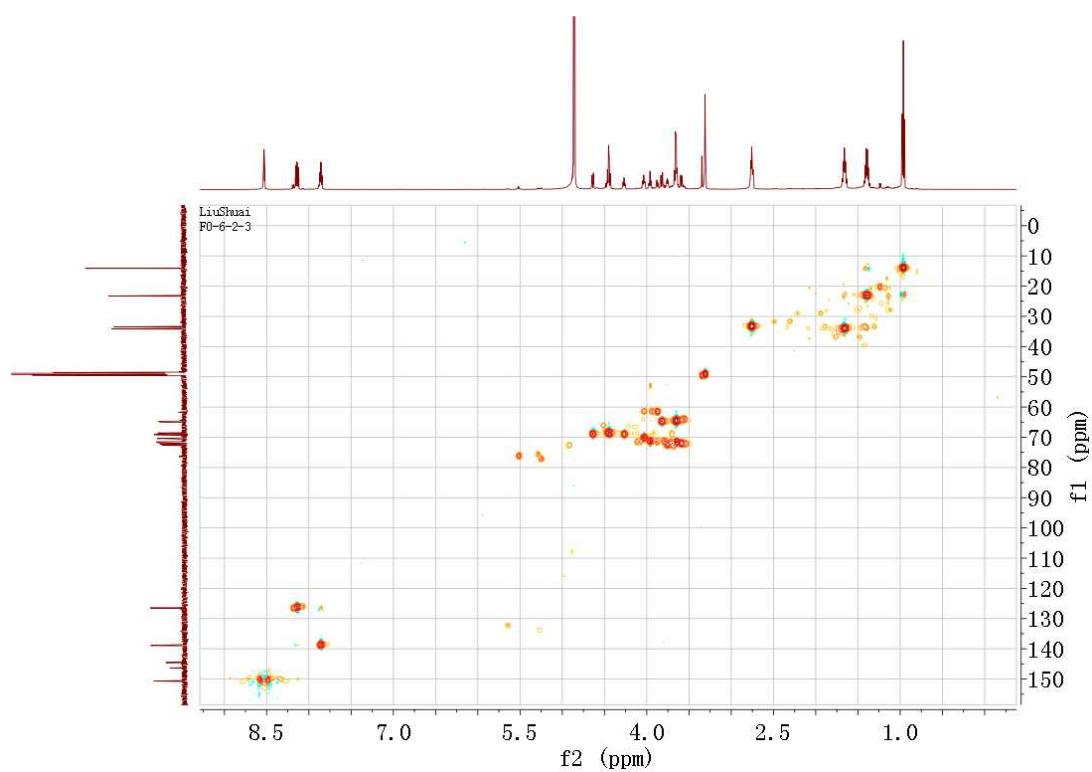

**S26.** HSQC (600 and 150 MHz, CD<sub>3</sub>OD) spectrum of mixture of **4** and **5**.

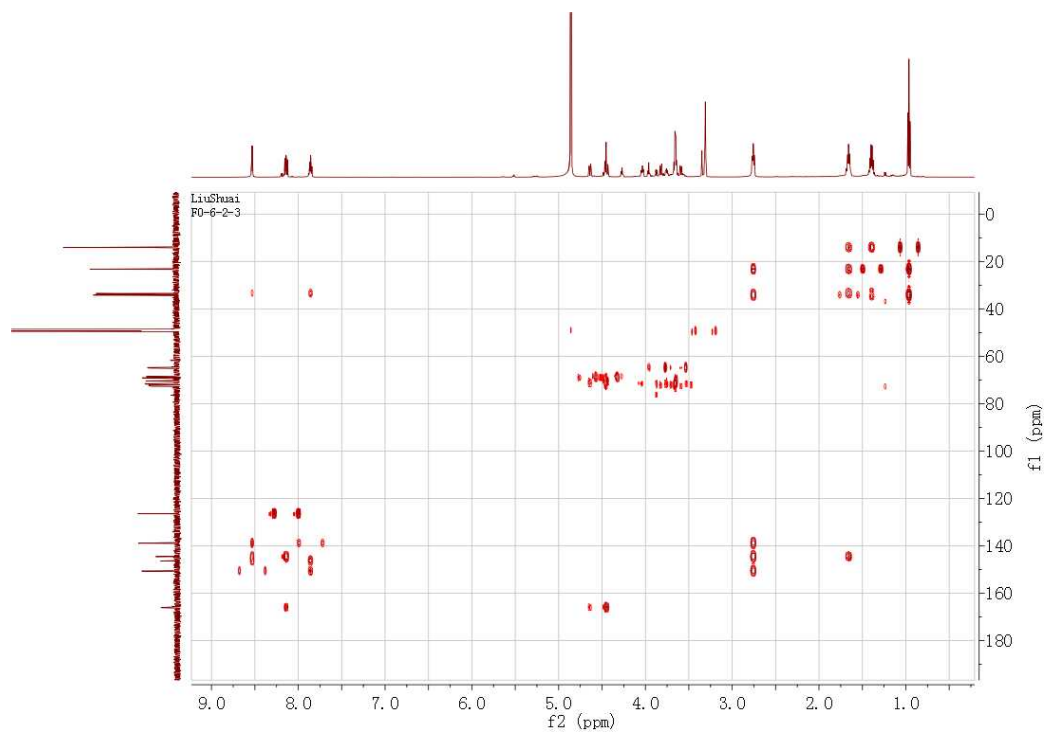

**S27.** HMBC (600 and 150 MHz, CD<sub>3</sub>OD) spectrum of mixture of **4** and **5**.

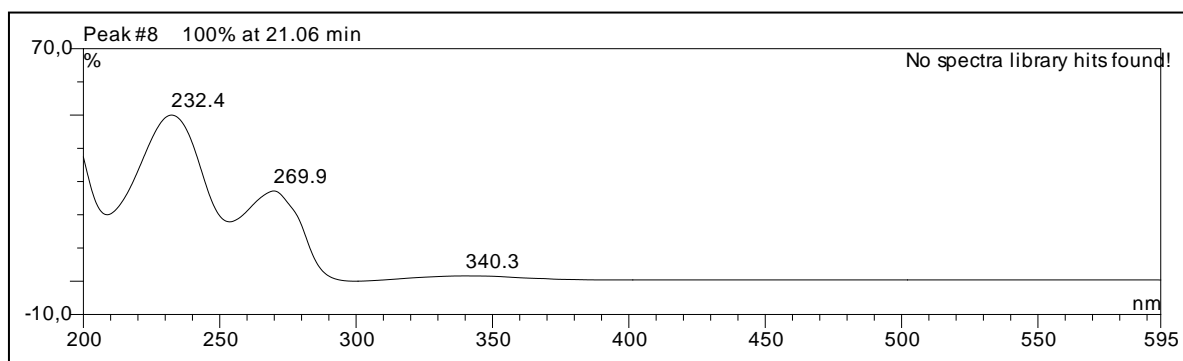

**S28.** UV spectrum of mixture of **6** and **7**.

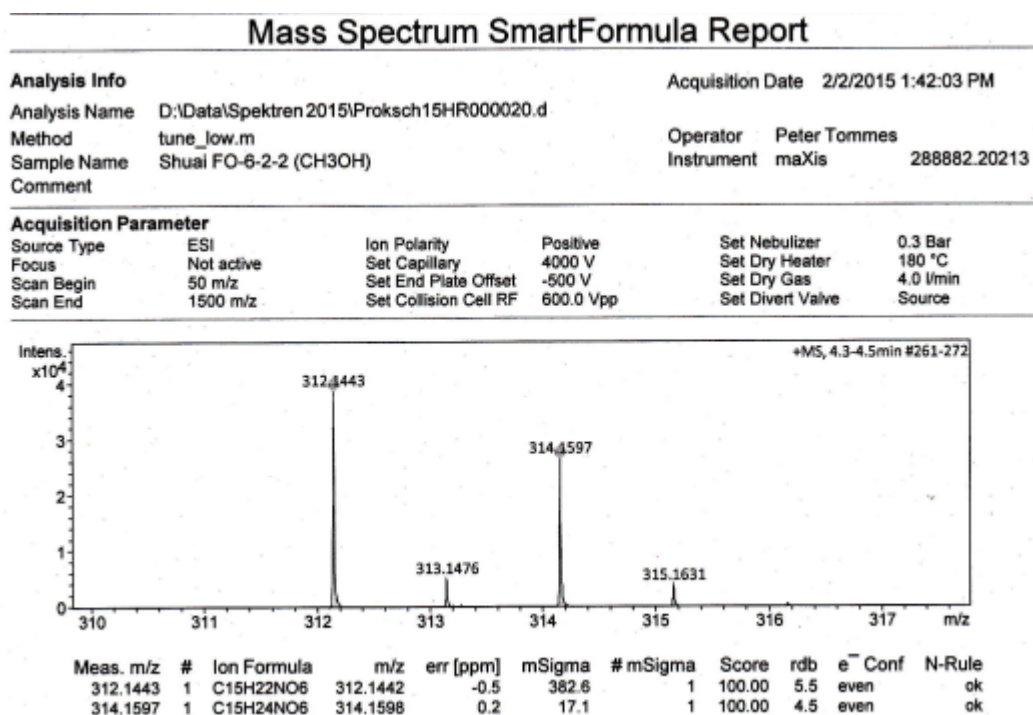

**S29.** HRESIMS spectrum of mixture of **6** and **7**.

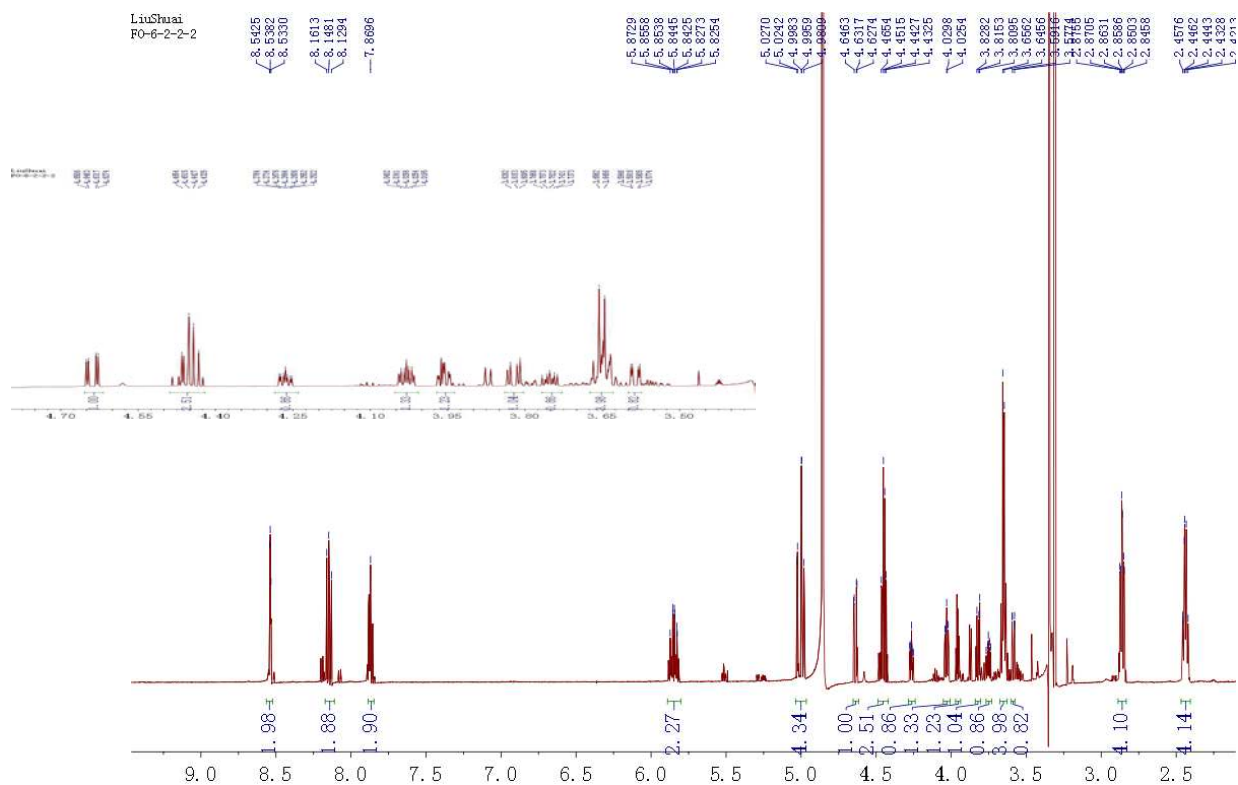

**S30.**  $^1\text{H}$  NMR (600 MHz,  $\text{CD}_3\text{OD}$ ) spectrum of mixture of **6** and **7**.

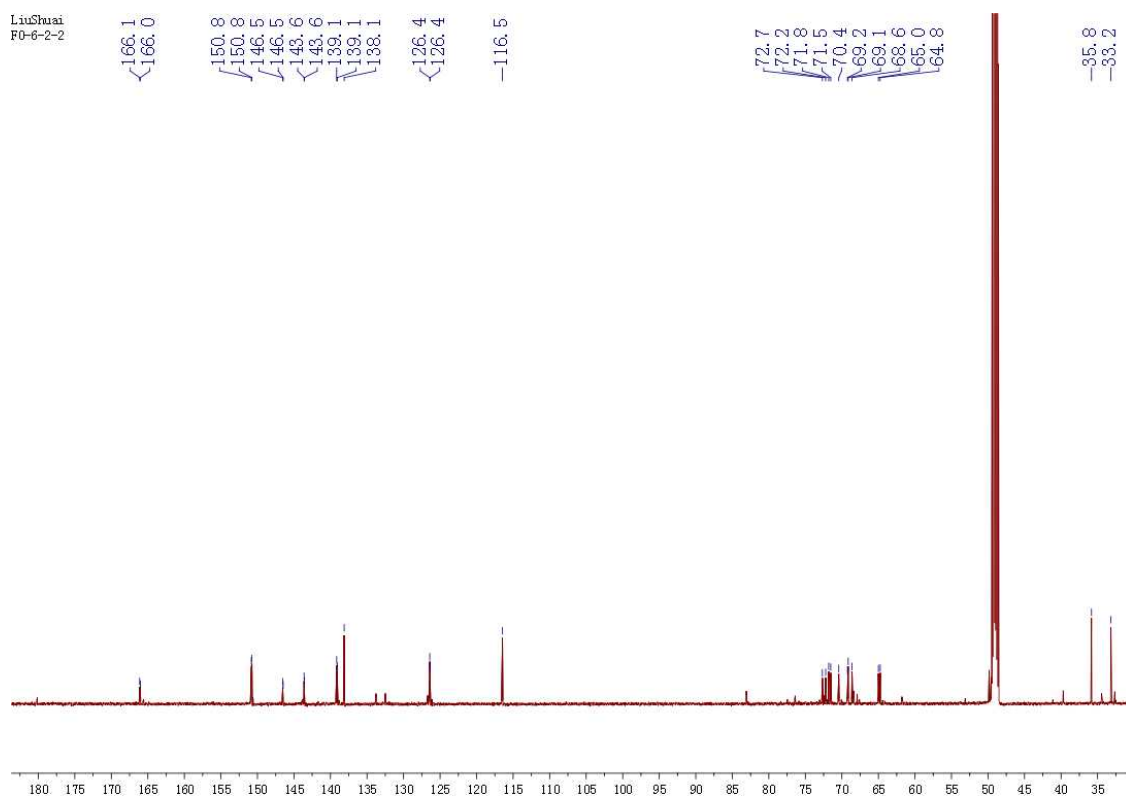

**S31.**  $^{13}\text{C}$  NMR (150 MHz,  $\text{CD}_3\text{OD}$ ) spectrum of mixture of **6** and **7**.

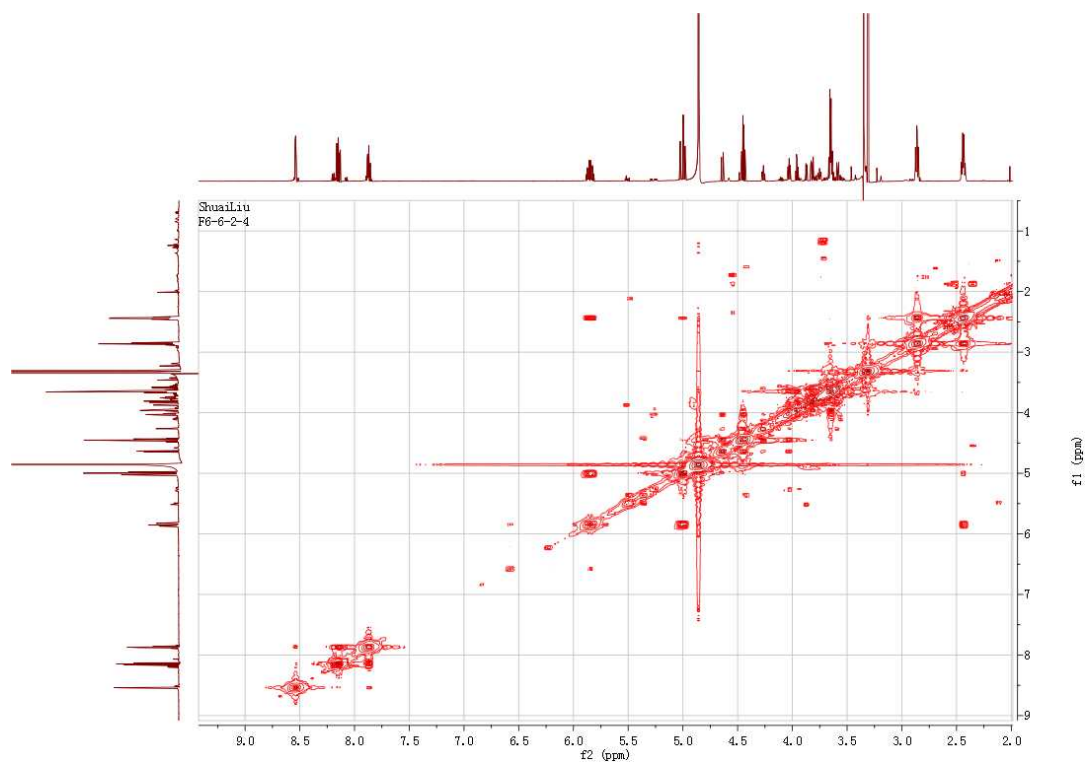

S32.  $^1\text{H}$ - $^1\text{H}$  COSY (600 MHz,  $\text{CD}_3\text{OD}$ ) spectrum of mixture of **6** and **7**.

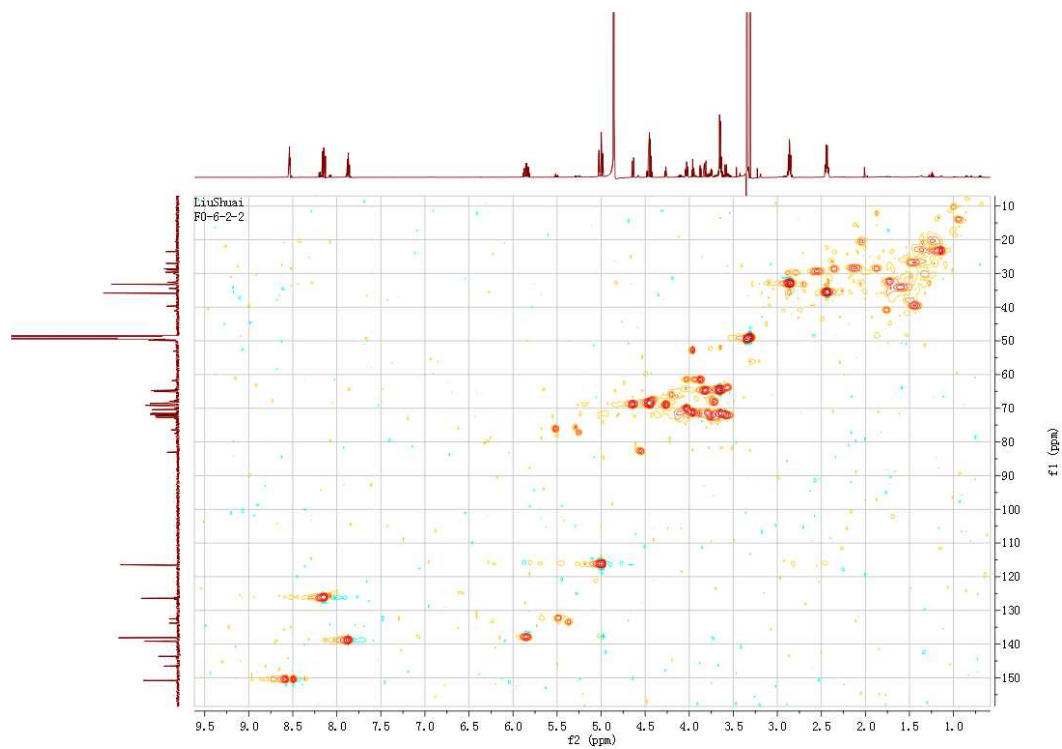

S33. HSQC (600 and 150 MHz,  $\text{CD}_3\text{OD}$ ) spectrum of mixture of **6** and **7**.

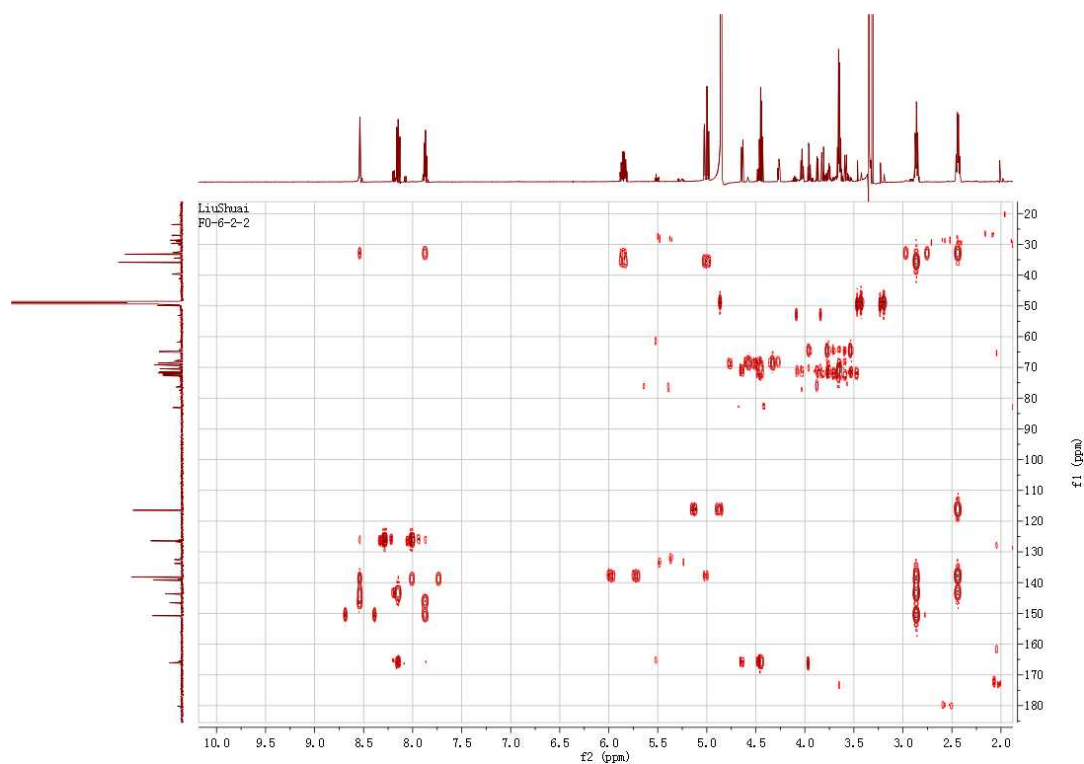

**S34.** HMBC (600 and 150 MHz, CD<sub>3</sub>OD) spectrum of mixture of **6** and **7**.

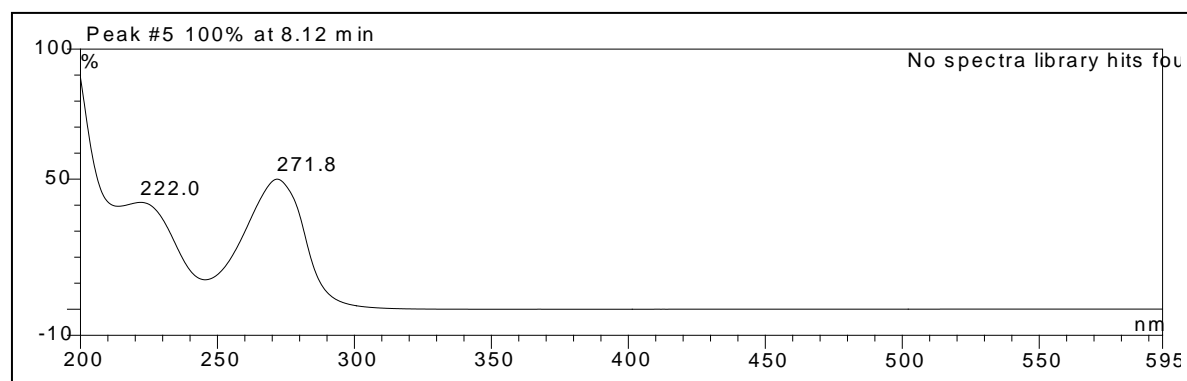

**S35.** UV spectrum of compound **8**.



## Mass Spectrum SmartFormula Report

### Analysis Info

Analysis Name D:\Data\Spektren 2015\Proksch15HR000024.d  
 Method tune\_low.m  
 Sample Name Shuai FO-7-1-1 (CH<sub>3</sub>OH)  
 Comment

Acquisition Date 2/2/2015 3:41:04 PM

Operator Peter Tommes  
 Instrument maXis 288882.20213

### Acquisition Parameter

|             |            |                       |           |                  |           |
|-------------|------------|-----------------------|-----------|------------------|-----------|
| Source Type | ESI        | Ion Polarity          | Positive  | Set Nebulizer    | 0.3 Bar   |
| Focus       | Not active | Set Capillary         | 4000 V    | Set Dry Heater   | 180 °C    |
| Scan Begin  | 50 m/z     | Set End Plate Offset  | -500 V    | Set Dry Gas      | 4.0 l/min |
| Scan End    | 1500 m/z   | Set Collision Cell RF | 600.0 Vpp | Set Divert Valve | Source    |

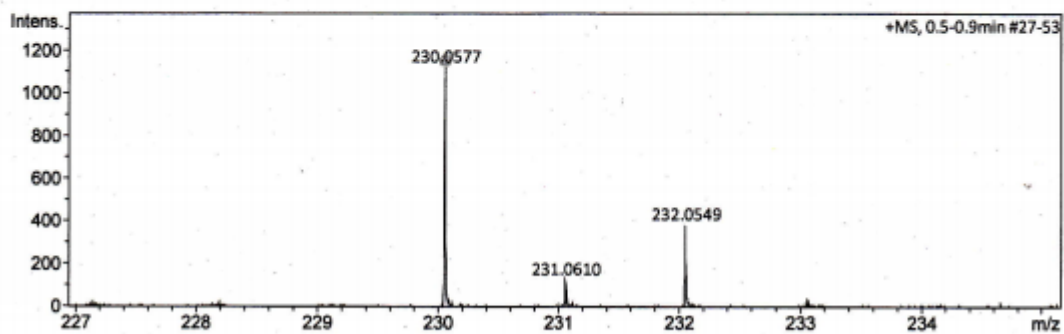

| Meas. m/z | # | Ion Formula                                       | m/z      | err [ppm] | mSigma | # mSigma | Score  | rdb | e <sup>-</sup> Conf | N-Rule |
|-----------|---|---------------------------------------------------|----------|-----------|--------|----------|--------|-----|---------------------|--------|
| 230.0577  | 1 | C <sub>10</sub> H <sub>13</sub> CINO <sub>3</sub> | 230.0578 | 0.8       | 19.4   | 1        | 100.00 | 4.5 | even                | ok     |

S36. HRESIMS spectrum of compound **8**.

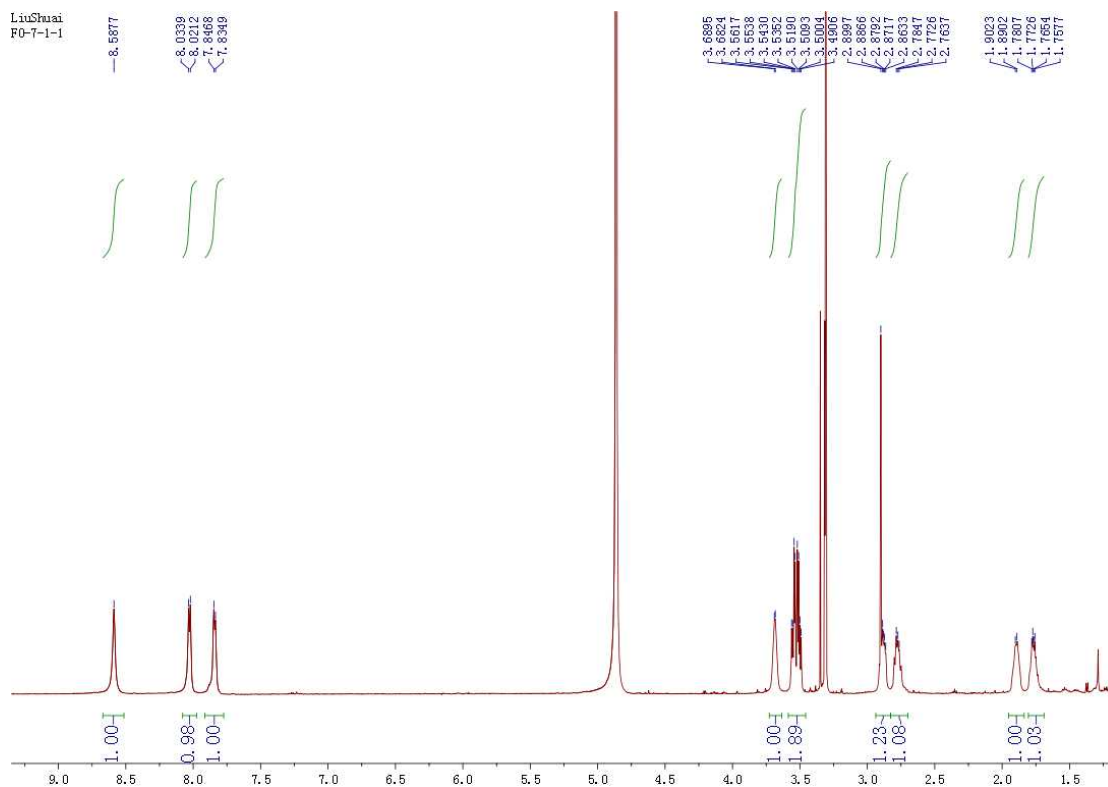

S37. <sup>1</sup>H NMR (600 MHz, CD<sub>3</sub>OD) spectrum of compound **8**.



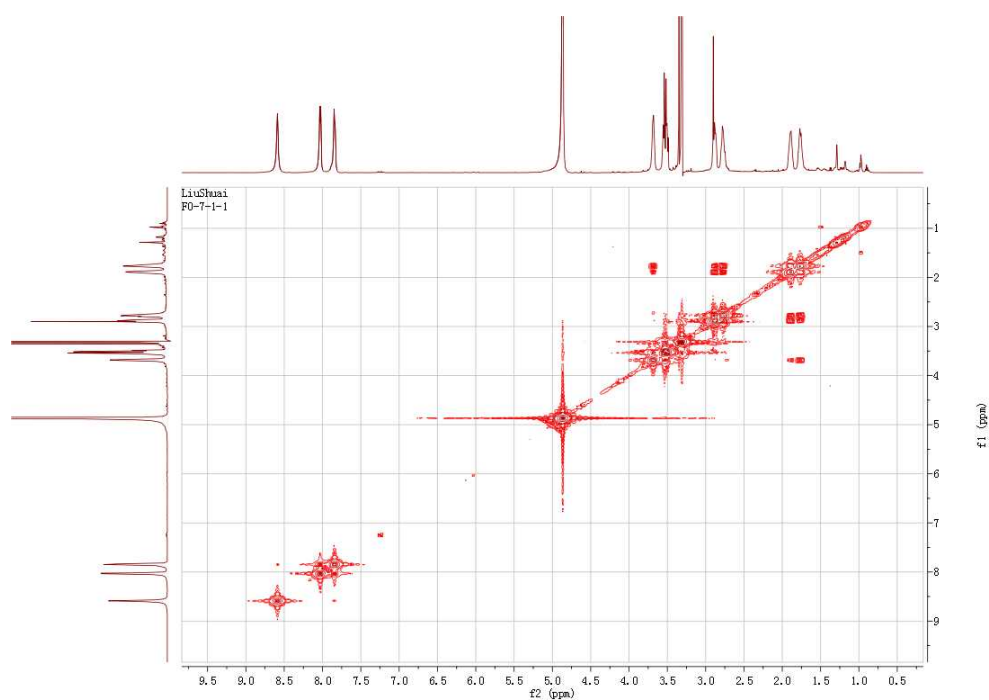

**S38.**  $^1\text{H}$ - $^1\text{H}$  COSY (600 MHz,  $\text{CD}_3\text{OD}$ ) spectrum of compound **8**.

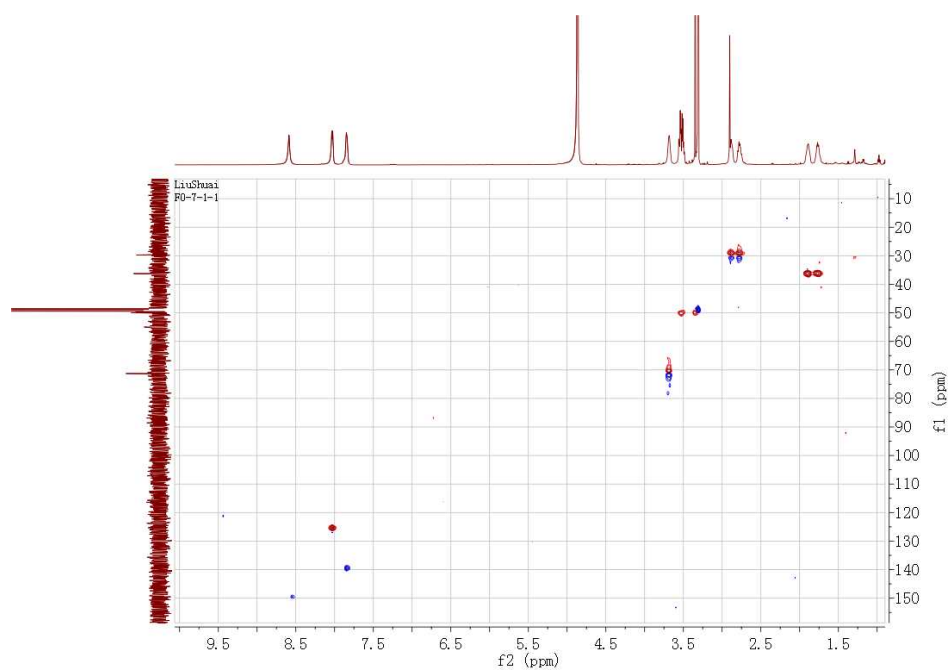

**S39.** HSQC (600 and 150 MHz,  $\text{CD}_3\text{OD}$ ) spectrum of compound **8**.

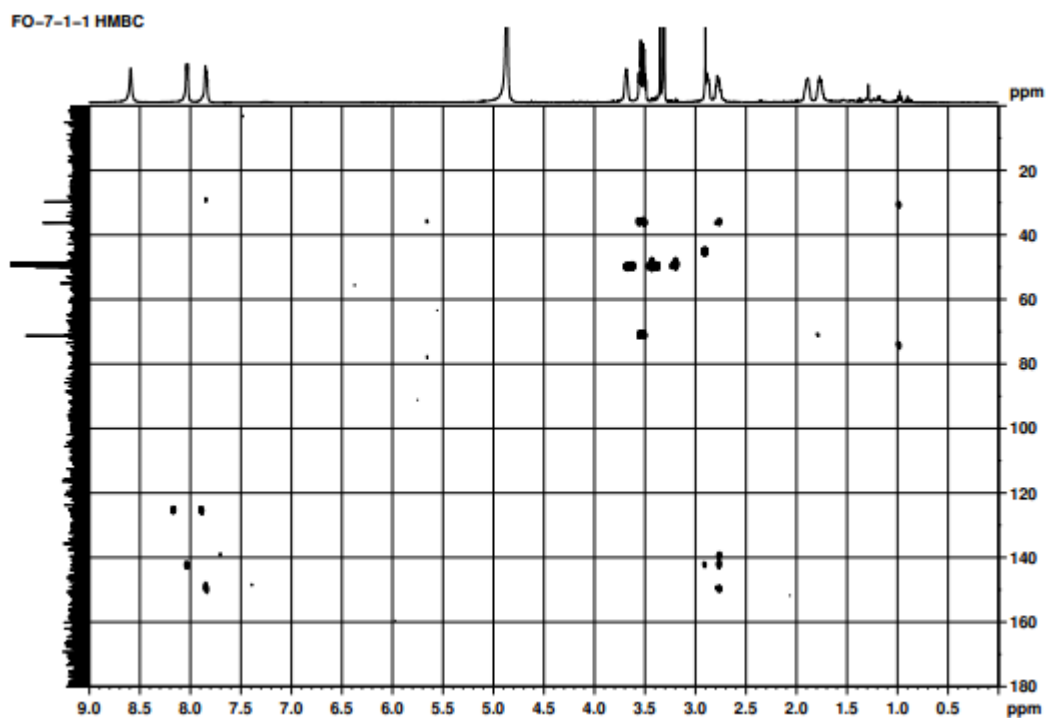

**S40.** HMBC (600 and 150 MHz, CD<sub>3</sub>OD) spectrum of compound **8**.

**S41.** Phytotoxic bioassay for fusaric acid derivatives (20  $\mu$ L at three locations on barley leaf).

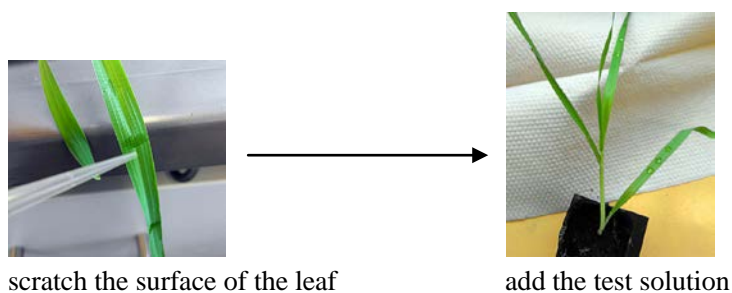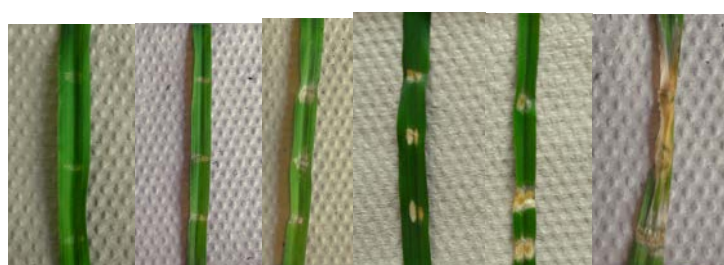

Score      0          1          2          3          4          5  
 Visual rating: 0 = no necrosis (negative control); 5 = severe necrosis.

**Compound 1**

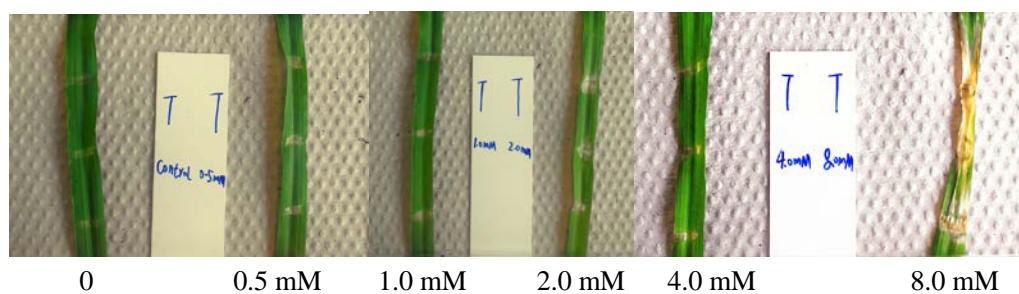

**Compound 2**

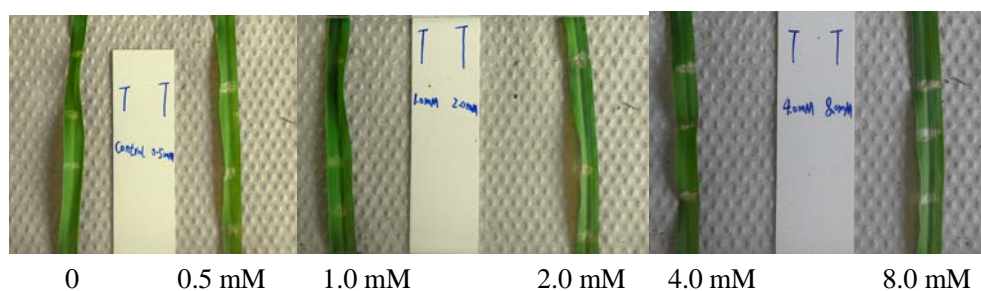

### Compound 3

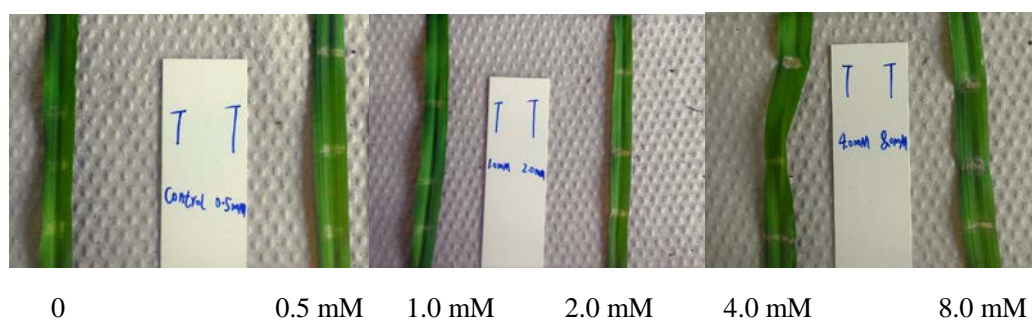

### Mixture of compounds 4 and 5

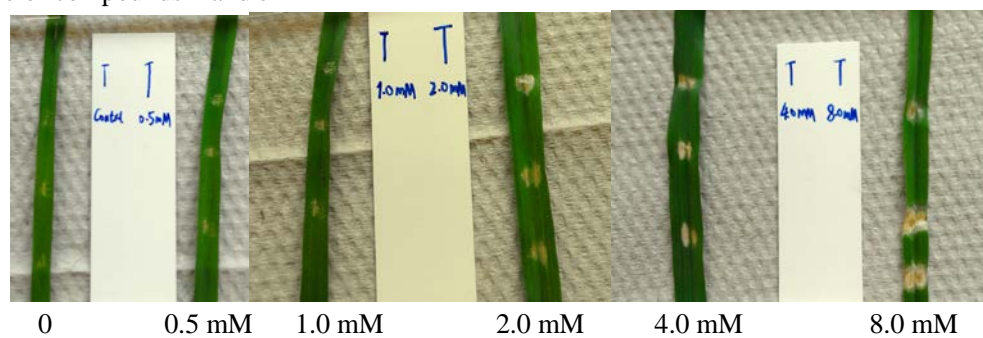

### Mixture of compounds 6 and 7

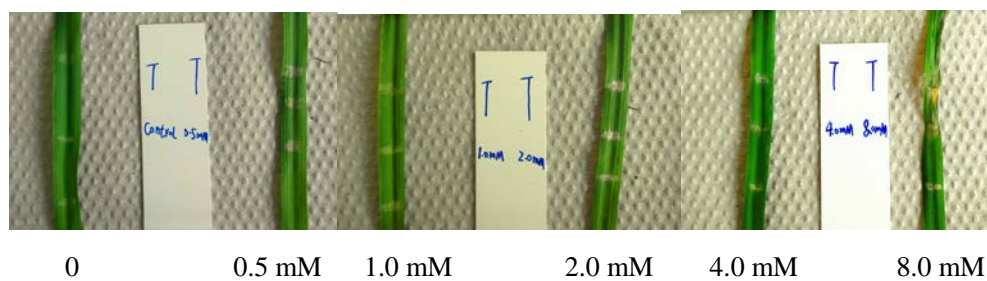

### Compound 8

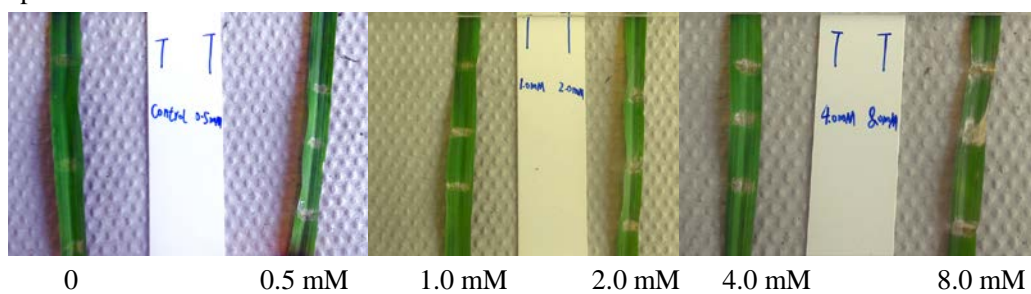

Supplement: Supplementary file 1 [file 4943989]
